# Supplementary material
Source: publisher figshare collection journal article supplement (https://acs.figshare.com/ndownloader/files/4101262)

## Supporting Information

### Ruthenium-Catalyzed C–H Bond Oxygenations with Weakly-Coordinating Ketones

Vedhagiri S. Thirunavukkarasu and Lutz Ackermann,\*

*Institut für Organische und Bimolekulare Chemie, Georg-August-Universität,*

*Tammannstrasse 2, 37077 Göttingen, Germany*

[Lutz.Ackermann@chemie.uni-goettingen.de](mailto:Lutz.Ackermann@chemie.uni-goettingen.de)

|                                                                                  |      |
|----------------------------------------------------------------------------------|------|
| General Remarks                                                                  | S-2  |
| Representative Procedure: Ruthenium-Catalyzed Oxidative Hydroxylation of Ketones | S-3  |
| Preparation and Characterization Data of Products <b>2</b>                       | S-4  |
| Intermolecular Competition Experiment with Ketones <b>1</b>                      | S-13 |
| References                                                                       | S-15 |
| <sup>1</sup> H- and <sup>13</sup> C-NMR Spectra                                  | S-16 |

## General Remarks

Catalytic reactions were carried out using pre-dried glassware. The following starting materials were synthesized according to previously described methods: **1f–1j**<sup>1</sup> and **1k–1r**.<sup>2</sup> Other chemicals were obtained from commercial sources, and were used without further purification. Yields refer to isolated compounds, estimated to be >95% pure as determined by <sup>1</sup>H-NMR and GC. TLC: Macherey-Nagel, TLC plates Alugram<sup>®</sup> Sil G/UV254. Detection under UV light at 254 nm. Chromatography: Separations were carried out on Merck Silica 60 (0.040–0.063 mm, 70–230 mesh ASTM). All IR spectra were recorded on a BRUKER ALPHA-P spectrometer. MS: EI-MS: Finnigan MAT 95, 70 eV; ESI-MS: Finnigan LCQ. High resolution mass spectrometry (HR-MS): APEX IV 7T FTICR, Bruker Daltonic. M.p.: Stuart<sup>®</sup> Melting Point Apparatus SMP3 melting point apparatus, values are uncorrected. <sup>1</sup>H-, <sup>13</sup>C-, and <sup>19</sup>F- NMR-spectra were recorded at 300 (<sup>1</sup>H), 75.5 {<sup>13</sup>C, APT (Attached Proton Test)} and 283 MHz (<sup>19</sup>F), respectively, on Varian Unity-300 and AMX 300 instruments in CDCl<sub>3</sub> solutions, if not otherwise specified, chemical shifts ( $\delta$ ) are given in ppm.

### General Procedure: Ruthenium-Catalyzed Hydroxylation of Ketones **1**

In a 20 mL pre-dried screw-capped sealed tube, ketone (**1**) (1.00 mmol),  $[\text{Ru}(\text{O}_2\text{CMes})_2(p\text{-cymene})]$  (1.0– 5.0 mol %) in TFA/TFAA (2.5 mL, 3:2) was stirred at 120 °C for 30 h. At ambient temperature, the reaction mixture was diluted with  $\text{H}_2\text{O}$  (75 mL) and extracted with  $\text{CH}_2\text{Cl}_2$  (3 x 25 mL). The combined organic layers were washed with brine (50 mL) and dried over  $\text{Na}_2\text{SO}_4$ . After filtration and evaporation of the solvents *in vacuo*, the crude product was purified by column chromatography on silica gel to yield product **2**.

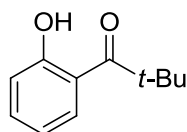

**1-(2-Hydroxyphenyl)-2,2-dimethylpropan-1-one (2a):** The representative procedure was followed using 2,2-dimethyl-1-phenylpropan-1-one (**1a**) (162 mg, 1.00 mmol). Purification by column chromatography (*n*-hexane/EtOAc: 97/3) yielded **2a** (151 mg, 85%) as a colorless liquid.  $^1\text{H-NMR}$  (300 MHz,  $\text{CDCl}_3$ )  $\delta$  = 12.69 (s, 1H), 8.02 (dd,  $J$  = 8.3, 1.6 Hz, 1H), 7.41 (ddd,  $J$  = 8.6, 7.2, 1.5 Hz, 1H), 7.00 (d,  $J$  = 9.0 Hz, 1H), 6.84 (ddd,  $J$  = 8.3, 7.1, 1.2 Hz, 1H), 1.45 (s, 9H).  $^{13}\text{C-NMR}$  (75 MHz,  $\text{CDCl}_3$ )  $\delta$  = 212.1 ( $\text{C}_\text{q}$ ), 163.6 ( $\text{C}_\text{q}$ ), 135.3 (CH), 130.8 (CH), 119.2 (CH), 117.7 (CH), 117.4 ( $\text{C}_\text{q}$ ), 44.5 ( $\text{C}_\text{q}$ ), 28.7 ( $\text{CH}_3$ ). IR (neat): 2975, 1627, 1443, 835  $\text{cm}^{-1}$ . MS (EI)  $m/z$  (relative intensity): 178 ( $[\text{M}^+]$  10), 121 (100), 77 (5). HR-MS (EI)  $m/z$  calcd for  $\text{C}_{11}\text{H}_{14}\text{O}_2^+$  178.0994, found 178.0991.

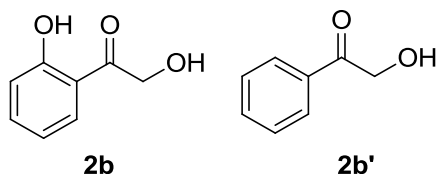

**2-Hydroxy-1-(2'-hydroxyphenyl)ethanone (2b) and 2-Hydroxy-1-phenylethanone (2b'):** The representative procedure was followed using acetophenone (**1b**) (120 mg, 1.00 mmol). Purification by column chromatography (*n*-hexane/EtOAc: 9/1) yielded **2b** (3 mg, 2%) as a colorless solid and **2b'** (5 mg, 4%) as a colorless solid. **2b**: M.p. = 63–65 °C.  $^1\text{H-NMR}$  (300 MHz,  $\text{CDCl}_3$ )  $\delta$  = 11.49 (s, 1H), 7.62 – 7.47 (m, 2H), 7.04 (ddd,  $J$  = 8.3, 1.2, 0.7 Hz, 1H), 6.93 (dd,  $J$  = 7.5, 3.0 Hz, 1H), 4.91 (d,  $J$  = 4.8 Hz, 2H), 3.38 (s, 1H).  $^{13}\text{C-NMR}$  (75 MHz,  $\text{CDCl}_3$ )  $\delta$  = 202.7 ( $\text{C}_\text{q}$ ), 161.9 ( $\text{C}_\text{q}$ ), 137.2 (CH), 128.1 (CH), 119.5 (CH), 118.7 (CH), 116.6 ( $\text{C}_\text{q}$ ), 64.5 ( $\text{CH}_2$ ). IR (neat): 3419, 2915, 1686, 1612, 1581, 1406, 872  $\text{cm}^{-1}$ . MS (ESI)  $m/z$  (relative intensity): 152 ( $[\text{M}^+]$  20), 121 (100), 105 (50), 77 (40). HR-MS (EI)  $m/z$  calcd for  $\text{C}_8\text{H}_8\text{O}_3^+$  152.0473, found 152.0470. The spectral data are in accordance with those reported in the literature.<sup>4</sup> **2b'**: M.p. = 73–75 °C.  $^1\text{H-NMR}$  (300 MHz,  $\text{CDCl}_3$ )  $\delta$  = 7.93 (dd,  $J$  = 8.3, 1.4 Hz, 2H), 7.72 – 7.58 (m, 1H), 7.51 (dd,  $J$  = 8.3, 7.2 Hz, 2H), 4.88 (s, 2H), 3.51 (s, 1H).  $^{13}\text{C-NMR}$  (75 MHz,  $\text{CDCl}_3$ )  $\delta$  = 198.3 ( $\text{C}_\text{q}$ ), 134.2 (CH), 133.4 ( $\text{C}_\text{q}$ ), 128.9 (CH), 127.6 (CH), 65.4 ( $\text{CH}_2$ ). IR (neat): 3071, 2935, 1616, 1591, 1406, 866  $\text{cm}^{-1}$ . MS (EI)  $m/z$  (relative intensity): 136 ( $[\text{M}^+]$  2), 121 (30), 105 (100), 77 (70). HR-MS (EI)  $m/z$  calcd for  $\text{C}_8\text{H}_8\text{O}_2^+$  136.0524, found 136.0525. The spectral data are in accordance with those reported in the literature.<sup>3</sup>

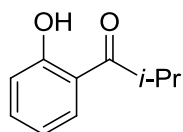

**1-(2'-Hydroxyphenyl)-2-methylpropan-1-one (2c):** The representative procedure was followed using 2-methyl-1-phenylpropan-1-one (**1c**) (148 mg, 1.00 mmol). Purification by column chromatography (*n*-hexane/EtOAc: 98/2) yielded **2c** (21 mg, 13%) as a colorless liquid.  $^1\text{H-NMR}$  (300 MHz,  $\text{CDCl}_3$ )  $\delta$  = 12.52 (s, 1H), 7.79 (dd,  $J$  = 8.1, 1.6 Hz, 1H), 7.46 (ddd,  $J$  = 8.6, 7.2, 1.7 Hz, 1H), 6.99 (dd,  $J$  = 8.4, 1.2 Hz, 1H), 6.94 – 6.84 (m, 1H), 3.62 (hept,  $J$  = 6.9 Hz, 1H), 1.25 (d,  $J$  = 6.9 Hz, 6H).  $^{13}\text{C-NMR}$  (75 MHz,  $\text{CDCl}_3$ )  $\delta$  = 210.8 ( $\text{C}_\text{q}$ ), 163.1 ( $\text{C}_\text{q}$ ), 136.1 (CH), 129.8 (CH), 118.8 (CH), 118.7 (CH), 118.1 ( $\text{C}_\text{q}$ ), 34.9 (CH), 19.3 ( $\text{CH}_3$ ). IR (neat): 2975, 1634, 1580, 1486, 820  $\text{cm}^{-1}$ . MS (ESI)  $m/z$  (relative intensity): 187 ( $[\text{M}+\text{Na}^+]$  90), 140 (15), 115 (25). HR-MS (ESI)  $m/z$  calcd for  $\text{C}_{10}\text{H}_{12}\text{O}_2+\text{Na}^+$  187.0735, found 187.0730. The spectral data are in accordance with those reported in the literature.<sup>5</sup>

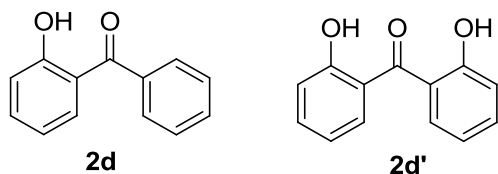

**(2-Hydroxyphenyl)(phenyl)methanone (2d) and Bis(2-hydroxyphenyl)methanone (2d'):** The representative procedure was followed using benzophenone (**1d**) (182 mg, 1.00 mmol). Purification by column chromatography (*n*-hexane/EtOAc: 97/3) yielded **2d** (53 mg, 28%) as a yellow viscous liquid and **2d'** (121 mg, 57%) as a pale yellow viscous liquid. **2d**:  $^1\text{H-NMR}$  (300 MHz,  $\text{CDCl}_3$ )  $\delta$  = 12.06 (s, 1H), 7.66 (dd,  $J$  = 8.4, 1.2 Hz, 2H), 7.62 – 7.55 (m, 2H), 7.55 – 7.44 (m, 3H), 7.08 (d,  $J$  = 8.3 Hz, 1H), 6.87 (t,  $J$  = 7.6 Hz, 1H).  $^{13}\text{C-NMR}$  (75 MHz,  $\text{CDCl}_3$ )  $\delta$  = 201.5 ( $\text{C}_\text{q}$ ), 163.1 ( $\text{C}_\text{q}$ ), 137.8 ( $\text{C}_\text{q}$ ), 136.3 (CH), 133.5 (CH), 131.6 (CH), 129.1 (CH), 128.3 (CH), 119.0 ( $\text{C}_\text{q}$ ), 118.6 (CH), 118.3 (CH). IR (neat): 3059, 1624, 1598, 824  $\text{cm}^{-1}$ . MS (EI)  $m/z$  (relative intensity): 198 ( $[\text{M}^+]$  70), 197 ( $[\text{M}-\text{H}^+]$  100), 121 (60), 77 (45). HR-MS (EI)  $m/z$  calcd for  $\text{C}_{13}\text{H}_{10}\text{O}_2$   $[\text{M}-\text{H}^+]$  197.0603, found 197.0608. The spectral data are in accordance with those reported in the literature.<sup>6</sup> **2d'**:  $^1\text{H-NMR}$  (300 MHz,  $\text{CDCl}_3$ )  $\delta$  = 10.59 (s, 2H), 7.62 (d,  $J$  = 7.9 Hz, 2H), 7.52 (ddd,  $J$  = 8.6, 7.1, 1.8 Hz, 2H), 7.11 (d,  $J$  = 8.2 Hz, 2H), 6.94 (ddd,  $J$  = 7.4, 6.9, 1.6 Hz, 2H).  $^{13}\text{C-NMR}$  (75 MHz,  $\text{CDCl}_3$ )  $\delta$  = 202.3 ( $\text{C}_\text{q}$ ), 161.7 ( $\text{C}_\text{q}$ ), 135.9 (CH), 133.0 (CH), 119.8 ( $\text{C}_\text{q}$ ), 118.8 (CH), 118.6 (CH). IR (neat): 3060, 1612, 1585, 1226, 840  $\text{cm}^{-1}$ .

MS (EI)  $m/z$  (relative intensity): 214 ( $[M^+]$  55), 213 ( $[M-H^+]$  45), 121 (100). HR-MS (EI)  $m/z$  calcd for  $C_{13}H_{10}O_3$   $[M-H^+]$  213.0552, found 213.0550.

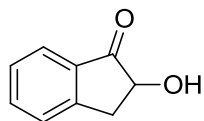

**2-Hydroxy-2,3-dihydro-1H-inden-1-one (2e):** The representative procedure was followed using 2,3-dihydro-1H-inden-1-one (**1e**) (132 mg, 1.00 mmol). Purification by column chromatography (*n*-hexane/EtOAc: 7/3) yielded **2e** (101 mg, 68%) as a yellow viscous liquid.  $^1H$ -NMR (300 MHz,  $CDCl_3$ )  $\delta$  = 7.75 (d,  $J$  = 7.7 Hz, 1H), 7.68 – 7.58 (m, 1H), 7.50 – 7.40 (m, 1H), 7.38 (d,  $J$  = 7.6 Hz, 1H), 4.56 (dd,  $J$  = 7.9, 5.0 Hz, 1H), 3.58 (dd,  $J$  = 16.7, 8.0 Hz, 1H), 3.49 (s, 1H), 3.02 (dd,  $J$  = 16.6, 5.1 Hz, 1H).  $^{13}C$ -NMR (75 MHz,  $CDCl_3$ )  $\delta$  = 206.6 ( $C_q$ ), 150.9 ( $C_q$ ), 135.8 (CH), 134.0 ( $C_q$ ), 128.0 (CH), 126.7 (CH), 124.4 (CH), 74.2 (CH), 35.1 ( $CH_2$ ). IR (neat): 3400, 1702, 1606, 1466, 991  $cm^{-1}$ . MS (EI)  $m/z$  (relative intensity): 148 ( $[M^+]$  100), 119 (65), 65 (30). HR-MS (ESI)  $m/z$  calcd for  $C_9H_8O_2+Na^+$  171.0422, found 171.0419. The spectral data are in accordance with those reported in the literature.<sup>7</sup>

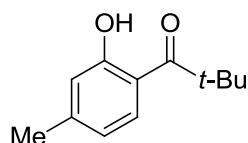

**1-(2'-Hydroxy-4'-methylphenyl)-2,2-dimethylpropan-1-one (2f):** The representative procedure was followed using 2,2-dimethyl-1-(*p*-tolyl)propan-1-one (**1f**) (171 mg, 1.00 mmol). Purification by column chromatography (*n*-hexane/EtOAc: 98/2) yielded **2f** (154 mg, 80%) as a yellow liquid.  $^1H$ -NMR (300 MHz,  $CDCl_3$ )  $\delta$  = 12.79 (s, 1H), 7.90 (d,  $J$  = 8.4 Hz, 1H), 6.81 (s, 1H), 6.66 (d,  $J$  = 8.5 Hz, 1H), 2.33 (s, 3H), 1.44 (s, 9H).  $^{13}C$ -NMR (75 MHz,  $CDCl_3$ )  $\delta$  = 211.5 ( $C_q$ ), 163.9 ( $C_q$ ), 146.7 ( $C_q$ ), 130.7 (CH), 119.2 (CH), 119.0 (CH), 115.1 ( $C_q$ ), 44.4 ( $C_q$ ), 28.7 ( $CH_3$ ), 21.7 ( $CH_3$ ). IR (neat): 2973, 1629, 1568, 867  $cm^{-1}$ . MS (EI)  $m/z$  (relative intensity): 192 ( $[M^+]$  10), 135 (100). HR-MS (EI)  $m/z$  calcd for  $C_{12}H_{16}O_2^+$  192.1150, found 192.1143.

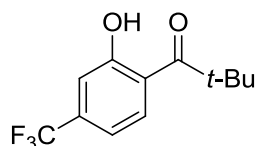

**1-(2'-Hydroxy-4'-(trifluoromethyl)phenyl)-2,2-dimethylpropan-1-one (2g):** The representative procedure was followed using 2,2-dimethyl-1-{4'-(trifluoromethyl)phenyl}propan-1-one (**1g**) (115 mg, 0.50 mmol). Purification by column chromatography (*n*-hexane/EtOAc: 97/3) yielded **2g** (78 mg, 63%) as a colorless liquid.  $^1\text{H-NMR}$  (300 MHz,  $\text{CDCl}_3$ )  $\delta$  = 12.63 (s, 1H), 8.11 (d,  $J$  = 8.6 Hz, 1H), 7.26 (dd,  $J$  = 1.3, 0.6 Hz, 1H), 7.06 (ddd,  $J$  = 8.6, 1.9, 0.6 Hz, 1H), 1.45 (s, 9H).  $^{13}\text{C-NMR}$  (75 MHz,  $\text{CDCl}_3$ )  $\delta$  = 211.9 ( $\text{C}_\text{q}$ ), 163.4 ( $\text{C}_\text{q}$ ), 136.2 ( $\text{C}_\text{q}$ ,  $J_{\text{C-F}}$  = 32.8 Hz), 131.5 (CH), 121.2 ( $\text{C}_\text{q}$ ), 125.0 ( $\text{C}_\text{q}$ ,  $J_{\text{C-F}}$  = 259.9 Hz), 119.5 ( $\text{C}_\text{q}$ ), 116.7 (CH,  $J_{\text{C-F}}$  = 3.9 Hz), 114.1 (CH,  $J_{\text{C-F}}$  = 3.6 Hz), 44.9 ( $\text{C}_\text{q}$ ), 28.5 ( $\text{CH}_3$ ).  $^{19}\text{F-NMR}$  (283 MHz,  $\text{CDCl}_3$ )  $\delta$  = -64.1 (s). IR (neat): 2979, 1642, 1574, 882  $\text{cm}^{-1}$ . MS (EI)  $m/z$  (relative intensity): 246 ( $[\text{M}^+]$  5), 189 (35), 98 (20), 57 (100). HR-MS (EI)  $m/z$  calcd for  $\text{C}_{12}\text{H}_{13}\text{F}_3\text{O}_2$   $[\text{M-H}^+]$  245.0789, found 245.0795.

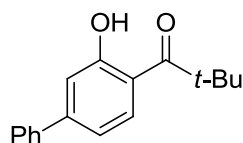

**1-(3-Hydroxy-[1,1'-biphenyl]-4-yl)-2,2-dimethylpropan-1-one (2h):** The representative procedure was followed using 1-([1,1'-biphenyl]-4-yl)-2,2-dimethylpropan-1-one (**1h**) (119 mg, 0.50 mmol). Purification by column chromatography (*n*-hexane/EtOAc: 97/3) yielded **2h** (72 mg, 57%) as a colorless solid. M.p. = 72–74 °C.  $^1\text{H-NMR}$  (300 MHz,  $\text{CDCl}_3$ )  $\delta$  = 12.89 (s, 1H), 8.10 (d,  $J$  = 8.6 Hz, 1H), 7.64 (d,  $J$  = 6.6 Hz, 2H), 7.56 – 7.38 (m, 3H), 7.26 (s, 1H), 7.11 (dd,  $J$  = 8.6, 2.0 Hz, 1H), 1.49 (s, 9H).  $^{13}\text{C-NMR}$  (75 MHz,  $\text{CDCl}_3$ )  $\delta$  = 211.7 ( $\text{C}_\text{q}$ ), 164.0 ( $\text{C}_\text{q}$ ), 147.8 ( $\text{C}_\text{q}$ ), 139.3 ( $\text{C}_\text{q}$ ), 131.3 (CH), 128.9 (CH), 128.5 (CH), 127.1 (CH), 117.2 (CH), 116.7 (CH), 116.2 ( $\text{C}_\text{q}$ ), 44.6 ( $\text{C}_\text{q}$ ), 28.7 ( $\text{CH}_3$ ). IR (neat): 2974, 1627, 1597, 1476, 867  $\text{cm}^{-1}$ . MS (EI)  $m/z$  (relative intensity): 254 ( $[\text{M}^+]$  10), 197 (100) 139 (15), 57 (5). HR-MS (ESI)  $m/z$  calcd for  $\text{C}_{17}\text{H}_{18}\text{O}_2$   $[\text{M-H}^+]$  253.1229, found 253.1225.

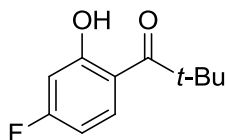

**1-(4'-Fluoro-2'-hydroxyphenyl)-2,2-dimethylpropan-1-one (2i):** The representative procedure was followed using 1-(4'-fluorophenyl)-2,2-dimethylpropan-1-one (**1i**) (180 mg, 1.00 mmol). Purification by column chromatography (*n*-hexane/EtOAc: 96/4) yielded **2i** (158 mg, 81%) as a yellow liquid. <sup>1</sup>H-NMR (300 MHz, CDCl<sub>3</sub>)  $\delta$  = 13.08 (s, 1H), 8.03 (ddd, *J* = 9.2, 6.6, 1.2 Hz, 1H), 6.66 (ddd, *J* = 10.3, 2.7, 1.3 Hz, 1H), 6.61 – 6.49 (m, 1H), 1.43 (s, 9H). <sup>13</sup>C-NMR (75 MHz, CDCl<sub>3</sub>)  $\delta$  = 211.0 (C<sub>q</sub>), 166.5 (C<sub>q</sub>, *J*<sub>C-F</sub> = 13.9 Hz), 164.6 (C<sub>q</sub>, *J*<sub>C-F</sub> = 256.0 Hz), 133.2 (CH, *J*<sub>C-F</sub> = 11.3 Hz), 114.4 (C<sub>q</sub>, *J*<sub>C-F</sub> = 2.3 Hz), 106.0 (CH, *J*<sub>C-F</sub> = 22.2 Hz), 105.5 (CH, *J*<sub>C-F</sub> = 23.2 Hz), 44.6 (C<sub>q</sub>), 28.7 (CH<sub>3</sub>). <sup>19</sup>F-NMR (283 MHz, CDCl<sub>3</sub>)  $\delta$  = - (100.8-100.9) (m). IR (neat): 2977, 1632, 1593, 850 cm<sup>-1</sup>. MS (EI) *m/z* (relative intensity): 196 ([M<sup>+</sup>] 10), 167 (25), 139 (100). HR-MS (EI) *m/z* calcd for C<sub>11</sub>H<sub>13</sub>FO<sub>2</sub><sup>+</sup> 196.0900, found 196.0903.

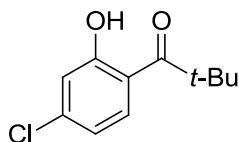

**1-(4'-Chloro-2'-hydroxyphenyl)-2,2-dimethylpropan-1-one (2j):** The representative procedure was followed using 1-(4'-chlorophenyl)-2,2-dimethylpropan-1-one (**1j**) (196 mg, 1.00 mmol). Purification by column chromatography (*n*-hexane/EtOAc: 97/3) yielded **2j** (177 mg, 83%) as a pale yellow liquid. <sup>1</sup>H-NMR (300 MHz, CDCl<sub>3</sub>)  $\delta$  = 12.82 (s, 1H), 7.91 (d, *J* = 8.8 Hz, 1H), 6.99 (d, *J* = 2.2 Hz, 1H), 6.80 (dd, *J* = 8.8, 2.2 Hz, 1H), 1.41 (s, 9H). <sup>13</sup>C-NMR (75 MHz, CDCl<sub>3</sub>)  $\delta$  = 211.4 (C<sub>q</sub>), 164.5 (C<sub>q</sub>), 140.9 (C<sub>q</sub>), 131.8 (CH), 119.2 (CH), 118.4 (CH), 115.9 (C<sub>q</sub>), 44.6 (C<sub>q</sub>), 28.9 (CH<sub>3</sub>). IR (neat): 2977, 1625, 1596, 860 cm<sup>-1</sup>. MS (EI) *m/z* (relative intensity): 212 ([M<sup>+</sup>] 50), 155 (100), 57 (22). MS (EI) *m/z* (relative intensity): HR-MS (EI) *m/z* calcd for C<sub>11</sub>H<sub>13</sub>ClO<sub>2</sub><sup>+</sup> 212.0604, found 212.0599.

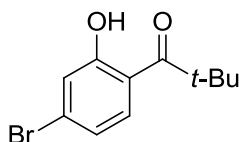

**1-(4'-Bromo-2'-hydroxyphenyl)-2,2-dimethylpropan-1-one (2k):** The representative procedure was followed using 1-(4'-bromophenyl)-2,2-dimethylpropan-1-one (**1k**) (241 mg, 1.00 mmol). Purification by column chromatography (*n*-hexane/EtOAc: 97/3) yielded **2k** (178 mg, 69%) as a colorless solid.



M.p. = 66–68 °C.  $^1\text{H-NMR}$  (300 MHz,  $\text{CDCl}_3$ )  $\delta$  = 12.82 (s, 1H), 7.86 (dd,  $J$  = 8.8, 0.8 Hz, 1H), 7.20 (dd,  $J$  = 2.1, 1.0 Hz, 1H), 6.98 (ddd,  $J$  = 8.8, 2.1, 0.9 Hz, 1H), 1.43 (s, 9H).  $^{13}\text{C-NMR}$  (75 MHz,  $\text{CDCl}_3$ )  $\delta$  = 211.6 ( $\text{C}_\text{q}$ ), 164.3 ( $\text{C}_\text{q}$ ), 131.7 (CH), 129.5 ( $\text{C}_\text{q}$ ), 122.4 (CH), 121.3 (CH), 116.2 ( $\text{C}_\text{q}$ ), 44.6 ( $\text{C}_\text{q}$ ), 28.6 ( $\text{CH}_3$ ). IR (neat): 2977, 1715, 1626, 1588, 862  $\text{cm}^{-1}$ . MS (EI)  $m/z$  (relative intensity): 256 ( $[\text{M}^+]$  10), 199 (100), 144 (10), 57 (45). HR-MS (ESI)  $m/z$  calcd for  $\text{C}_{11}\text{H}_{13}\text{BrO}_2^+$  256.0099, found 256.0093.

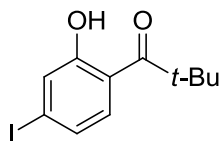

**1-(4'-Iodo-2'-hydroxyphenyl)-2,2-dimethylpropan-1-one (2l):** The representative procedure was followed using 1-(4'-iodophenyl)-2,2-dimethylpropan-1-one (**1l**) (144 mg, 0.50 mmol). Purification by column chromatography (*n*-hexane/EtOAc: 97/3) yielded **2l** (118 mg, 78%) as a colorless solid. M.p. = 78–80 °C.  $^1\text{H-NMR}$  (300 MHz,  $\text{CDCl}_3$ )  $\delta$  = 12.72 (s, 1H), 7.68 (d,  $J$  = 8.6 Hz, 1H), 7.43 (d,  $J$  = 1.8 Hz, 1H), 7.19 (dd,  $J$  = 8.6, 1.8 Hz, 1H), 1.43 (s, 9H).  $^{13}\text{C-NMR}$  (75 MHz,  $\text{CDCl}_3$ )  $\delta$  = 211.9 ( $\text{C}_\text{q}$ ), 163.6 ( $\text{C}_\text{q}$ ), 131.4 (CH), 128.6 (CH), 127.1 (CH), 116.7 ( $\text{C}_\text{q}$ ), 102.5 ( $\text{C}_\text{q}$ ), 44.7 ( $\text{C}_\text{q}$ ), 28.6 ( $\text{CH}_3$ ). IR (neat): 3134, 2976, 1673, 1579, 860  $\text{cm}^{-1}$ . MS (EI)  $m/z$  (relative intensity): 304 ( $[\text{M}+\text{H}^+]$  10), 246 (100), 120 (15), 57 (15). HR-MS (EI)  $m/z$  calcd for  $\text{C}_{11}\text{H}_{13}\text{IO}_2^+$  303.9960, found 303.9967.

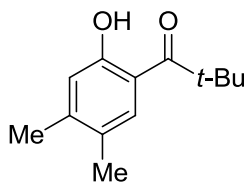

**1-(2'-Hydroxy-4',5'-dimethylphenyl)-2,2-dimethylpropan-1-one (2m):** The representative procedure was followed using 1-(3',4'-dimethylphenyl)-2,2-dimethylpropan-1-one (**1m**) (196 mg, 1.00 mmol). Purification by column chromatography (*n*-hexane/EtOAc: 97/3) yielded **2m** (138 mg, 67%) as a yellow solid. M.p. = 61–63 °C.  $^1\text{H-NMR}$  (300 MHz,  $\text{CDCl}_3$ )  $\delta$  = 12.61 (s, 1H), 7.75 (s, 1H), 6.80 (s, 1H), 2.24 (s, 3H), 2.22 (s, 3H), 1.44 (s, 9H).  $^{13}\text{C-NMR}$  (75 MHz,  $\text{CDCl}_3$ )  $\delta$  = 211.4 ( $\text{C}_\text{q}$ ), 162.0 ( $\text{C}_\text{q}$ ), 145.6 ( $\text{C}_\text{q}$ ), 130.9 (CH), 125.8 ( $\text{C}_\text{q}$ ), 119.6 (CH), 115.3 ( $\text{C}_\text{q}$ ), 44.4 ( $\text{C}_\text{q}$ ), 28.8 ( $\text{CH}_3$ ), 20.2 ( $\text{CH}_3$ ), 19.1 ( $\text{CH}_3$ ). IR (neat): 2954, 1632, 1599, 854  $\text{cm}^{-1}$ . MS (EI)  $m/z$  (relative intensity): 206 ( $[\text{M}^+]$  10), 149 (90), 57 (25). HR-MS (ESI)  $m/z$  calcd for  $\text{C}_{13}\text{H}_{18}\text{O}_2^+$  206.1307, found 206.1304.

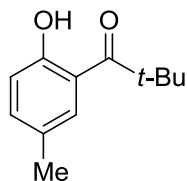

**1-(2-Hydroxy-5-methylphenyl)-2,2-dimethylpropan-1-one (2n):** The representative procedure was followed using 2,2-dimethyl-1-(*m*-tolyl)propan-1-one (**1n**) (176 mg, 1.00 mmol). Purification by column chromatography (*n*-hexane/EtOAc: 97/3) yielded **2n** (158 mg, 82%) as a pale yellow liquid.  $^1\text{H-NMR}$  (300 MHz,  $\text{CDCl}_3$ )  $\delta$  = 12.50 (s, 1H), 7.79 (d,  $J$  = 1.9 Hz, 1H), 7.24 (dd,  $J$  = 8.8, 1.9 Hz, 1H), 6.92 (dd,  $J$  = 8.5, 1.3 Hz, 1H), 2.31 (s, 3H), 1.45 (s, 9H).  $^{13}\text{C-NMR}$  (75 MHz,  $\text{CDCl}_3$ )  $\delta$  = 212.0 ( $\text{C}_\text{q}$ ), 161.5 ( $\text{C}_\text{q}$ ), 136.3 (CH), 130.5 (CH), 126.6 ( $\text{C}_\text{q}$ ), 119.0 (CH), 117.2 ( $\text{C}_\text{q}$ ), 44.6 ( $\text{C}_\text{q}$ ), 28.8 ( $\text{CH}_3$ ), 20.8 ( $\text{CH}_3$ ). IR (neat): 2974, 1632, 1421, 876  $\text{cm}^{-1}$ . MS (EI)  $m/z$  (relative intensity): 192 ( $[\text{M}^+]$  10), 135 (100), 107 (10), 77 (15). HR-MS (ESI)  $m/z$  calcd for  $\text{C}_{12}\text{H}_{16}\text{O}_2 + \text{H}^+$  193.1229, found 193.1225.

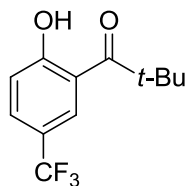

**1-{2'-Hydroxy-5'-(trifluoromethyl)phenyl}-2,2-dimethylpropan-1-one (2o):** The representative procedure was followed using 2,2-dimethyl-1-{3'-(trifluoromethyl)phenyl}propan-1-one (**1o**) (230 mg, 1.00 mmol). Purification by column chromatography (*n*-hexane/EtOAc: 97/3) yielded **2o** (97 mg, 39%) as a colorless liquid.  $^1\text{H-NMR}$  (300 MHz,  $\text{CDCl}_3$ )  $\delta$  = 12.93 (d,  $J$  = 0.4 Hz, 1H), 8.27 (dd,  $J$  = 2.2, 1.0 Hz, 1H), 7.63 (dd,  $J$  = 8.8, 2.3 Hz, 1H), 7.08 (d,  $J$  = 8.2 Hz, 1H), 1.45 (s, 9H).  $^{13}\text{C-NMR}$  (75 MHz,  $\text{CDCl}_3$ )  $\delta$  = 211.7 ( $\text{C}_\text{q}$ ), 166.0 ( $\text{C}_\text{q}$ ), 131.7 (CH,  $J_{\text{C-F}}$  = 3.4 Hz), 128.3 (CH,  $J_{\text{C-F}}$  = 4.1 Hz), 122.0 ( $\text{C}_\text{q}$ ,  $J_{\text{C-F}}$  = 269.0 Hz), 120.2 (CH), 119.9 ( $\text{C}_\text{q}$ ,  $J_{\text{C-F}}$  = 33.1 Hz), 116.6 ( $\text{C}_\text{q}$ ), 44.8 ( $\text{C}_\text{q}$ ), 28.6 ( $\text{CH}_3$ ).  $^{19}\text{F-NMR}$  (283 MHz,  $\text{CDCl}_3$ )  $\delta$  = -61.9 (s). IR (neat): 2980, 1640, 1592, 882  $\text{cm}^{-1}$ . MS (EI)  $m/z$  (relative intensity): 246 ( $[\text{M}^+]$  10), 189 (100), 161 (15), 57 (400). HR-MS (EI)  $m/z$  calcd for  $\text{C}_{12}\text{H}_{13}\text{F}_3\text{O}_2^+$  246.0868, found 246.0873.

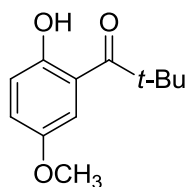

**1-(2-Hydroxy-5-methoxyphenyl)-2,2-dimethylpropan-1-one (2p):** The representative procedure was followed using 1-(3-methoxyphenyl)-2,2-dimethylpropan-1-one (**1p**) (176 mg, 1.00 mmol). Purification by column chromatography (*n*-hexane/EtOAc: 97/3) yielded **2p** (158 mg, 76%) as a yellow liquid.  $^1\text{H-NMR}$  (300 MHz,  $\text{CDCl}_3$ )  $\delta$  = 12.20 (s, 1H), 7.48 (d,  $J$  = 3.0 Hz, 1H), 7.07 (dd,  $J$  = 9.1, 3.0 Hz, 1H), 6.94 (d,  $J$  = 9.1 Hz, 1H), 3.78 (s, 3H), 1.45 (s, 9H).  $^{13}\text{C-NMR}$  (75 MHz,  $\text{CDCl}_3$ )  $\delta$  = 211.5 ( $\text{C}_\text{q}$ ), 157.8 ( $\text{C}_\text{q}$ ), 150.6 ( $\text{C}_\text{q}$ ), 122.7 (CH), 119.8 (CH), 117.0 ( $\text{C}_\text{q}$ ), 114.5 (CH), 55.9 ( $\text{CH}_3$ ), 44.6 ( $\text{C}_\text{q}$ ), 28.7 ( $\text{CH}_3$ ). IR (neat): 2974, 1636, 1608, 1483, 879  $\text{cm}^{-1}$ . MS (EI)  $m/z$  (relative intensity): 208 ( $[\text{M}^+]$  15), 151 (100), 43 (20). HR-MS (ESI)  $m/z$  calcd for  $\text{C}_{12}\text{H}_{16}\text{O}_3^+$  208.1099, found 208.1101.

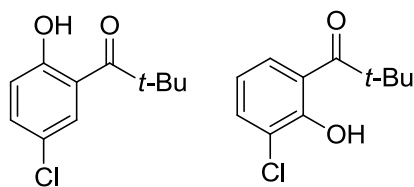

**1-(5'-Chloro-2'-hydroxyphenyl)-2,2-dimethylpropan-1-one (2q')** and **1-(3'-Chloro-2'-hydroxyphenyl)-2,2-dimethylpropan-1-one (2q'')**: The representative procedure was followed using 1-(3'-chlorophenyl)-2,2-dimethylpropan-1-one (**1q**) (196 mg, 1.00 mmol). Purification by thin layer chromatography (*n*-hexane/EtOAc: 97/3) yielded **2q'** (115 mg, 54%) as a colorless liquid and yielded **2q''** (34 mg, 16%) as a colorless liquid.  $^1\text{H-NMR}$  (300 MHz,  $\text{CDCl}_3$ )  $\delta$  = 12.55 (s, 1H), 7.96 (d,  $J$  = 2.5 Hz, 1H), 7.36 (dd,  $J$  = 8.9, 2.5 Hz, 1H), 6.96 (d,  $J$  = 8.9 Hz, 1H), 1.45 (s, 9H).  $^{13}\text{C-NMR}$  (75 MHz,  $\text{CDCl}_3$ )  $\delta$  = 211.2 ( $\text{C}_\text{q}$ ), 162.1 ( $\text{C}_\text{q}$ ), 135.2 (CH), 130.0 (CH), 122.4 ( $\text{C}_\text{q}$ ), 120.8 (CH), 117.9 ( $\text{C}_\text{q}$ ), 44.7 ( $\text{C}_\text{q}$ ), 28.6 ( $\text{CH}_3$ ). IR (neat): 2977, 1625, 1596, 860  $\text{cm}^{-1}$ . MS (EI)  $m/z$  (relative intensity): 212 ( $[\text{M}^+]$  20), 155 (100), 57 (22). MS (EI)  $m/z$  (relative intensity): HR-MS (EI)  $m/z$  calcd for  $\text{C}_{11}\text{H}_{13}\text{ClO}_2^+$  212.0604, found 212.0603. **2q''**:  $^1\text{H-NMR}$  (300 MHz,  $\text{CDCl}_3$ )  $\delta$  = 13.18 (s, 1H), 7.93 (dd,  $J$  = 8.3, 1.5 Hz, 1H), 7.51 (dd,  $J$  = 7.9, 1.5 Hz, 1H), 6.80 (dd,  $J$  = 8.3, 7.9 Hz, 1H), 1.43 (s, 9H).  $^{13}\text{C-NMR}$  (75 MHz,  $\text{CDCl}_3$ )  $\delta$  = 212.1 ( $\text{C}_\text{q}$ ), 159.2 ( $\text{C}_\text{q}$ ), 135.3 (CH), 129.2 (CH), 123.6 ( $\text{C}_\text{q}$ ), 118.6 ( $\text{C}_\text{q}$ ), 117.8 (CH), 44.9 ( $\text{C}_\text{q}$ ), 28.7 ( $\text{CH}_3$ ). IR (neat): 2976, 1632, 1602, 860  $\text{cm}^{-1}$ . MS (EI)  $m/z$  (relative intensity): 212

( $[M]^+$  20), 155 (100), 57 (22). MS (EI)  $m/z$  (relative intensity): HR-MS (EI)  $m/z$  calcd for  $C_{11}H_{13}ClO_2^+$  212.0604, found 212.0603.

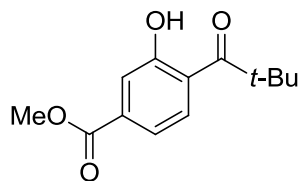

**Methyl 3-hydroxy-4-pivaloylbenzoate (2r):** The representative procedure was followed using methyl 4-pivaloylbenzoate (**1r**) (220 mg, 1.00 mmol). Purification by column chromatography (*n*-hexane/EtOAc: 97/3) yielded **2r** (145 mg, 61%) as a colourless solid. M.p. = 73–75 °C.  $^1H$  NMR (300 MHz,  $CDCl_3$ )  $\delta$  = 12.46 (s, 1H), 8.05 (d,  $J$  = 8.5 Hz, 1H), 7.63 (s, 1H), 7.46 (d,  $J$  = 8.5 Hz, 1H), 3.91 (s, 3H), 1.44 (s, 9H).  $^{13}C$  NMR (75 MHz,  $CDCl_3$ )  $\delta$  = 212.0 ( $C_q$ ), 165.8 ( $C_q$ ), 163.1 ( $C_q$ ), 135.5 ( $C_q$ ), 130.7 (CH), 120.5 (CH), 120.2 ( $C_q$ ), 118.2, (CH), 52.4 ( $CH_3$ ), 44.8 ( $C_q$ ), 28.5 ( $CH_3$ ). IR (neat): 2981, 1717, 1638, 1562, 1428, 794  $cm^{-1}$ . MS (EI)  $m/z$  (relative intensity): 236 ( $[M]^+$  7), 179 (100), 136 (10), 57 (30). HR-MS (EI)  $m/z$  calcd. for  $C_{13}H_{16}O_4^+$  236.1049, found 236.1048.

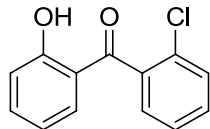

**(2-Chlorophenyl)(2-hydroxyphenyl)methanone (2s):** The representative procedure was followed using (2-chlorophenyl)(phenyl)methanone (**1s**) (216 mg, 1.00 mmol). Purification by thin layer chromatography (*n*-hexane/EtOAc: 97/3) yielded **2s** (108 mg, 47%) as a yellow liquid.  $^1H$ -NMR (300 MHz,  $CDCl_3$ )  $\delta$  = 11.96 (s, 1H), 7.57 – 7.32 (m, 5H), 7.25 (dd,  $J$  = 8.0, 1.6 Hz, 1H), 7.06 (dd,  $J$  = 8.4, 1.1 Hz, 1H), 6.83 (ddd,  $J$  = 8.2, 7.1, 1.2 Hz, 1H).  $^{13}C$ -NMR (75 MHz,  $CDCl_3$ )  $\delta$  = 200.6 ( $C_q$ ), 163.2 ( $C_q$ ), 137.3 ( $C_q$ ), 137.2 (CH), 133.5 (CH), 131.2 (CH), 130.8 (CH), 130.1 ( $C_q$ ), 128.5 (CH), 126.7 (CH), 119.3 ( $C_q$ ), 119.1 (CH), 118.3 (CH). IR (neat): 3059, 1624, 1598, 824  $cm^{-1}$ . MS (EI)  $m/z$  (relative intensity): 198 ( $[M]^+$  70), 197 ( $[M-H]^+$  100), 121 (60), 77 (45). HR-MS (EI)  $m/z$  calcd for  $C_{13}H_9ClO_2$   $[M-H]^+$  231.0213, found 231.0219.

### Intermolecular Competition Experiments between Ketones **1f** and **1i**

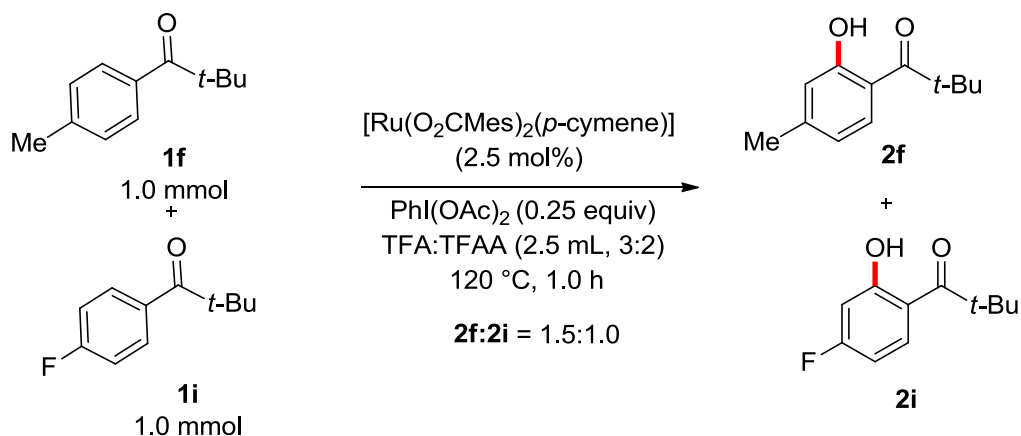

The mixture of 2,2-dimethyl-1-(*p*-tolyl)propan-1-one (**1f**), (176 mg, 1.00 mmol), 1-(4'-fluorophenyl)-2,2-dimethylpropan-1-one (**1i**), (180 mg, 1.00 mmol), [Ru(O<sub>2</sub>CMes)<sub>2</sub>(*p*-cymene)] (14 mg, 2.5 mol %) and PhI(OAc)<sub>2</sub> (161 mg, 0.25 equiv) in TFA/TFAA (2.5 mL, 3:2) was stirred at 120 °C under N<sub>2</sub> for 1 h. The reaction mixture was diluted with H<sub>2</sub>O (75 mL) and extracted with CH<sub>2</sub>Cl<sub>2</sub> (3 x 25 mL). The combined organic layers were washed with brine (50 mL) and dried over Na<sub>2</sub>SO<sub>4</sub>. After filtration and evaporation of the solvents *in vacuo*, the ratio of products **2f:2i** was found to be 1.5:1.0 by <sup>1</sup>H-NMR spectroscopy.

### Intermolecular Competition Experiments between Ketones **1f** and **1g**

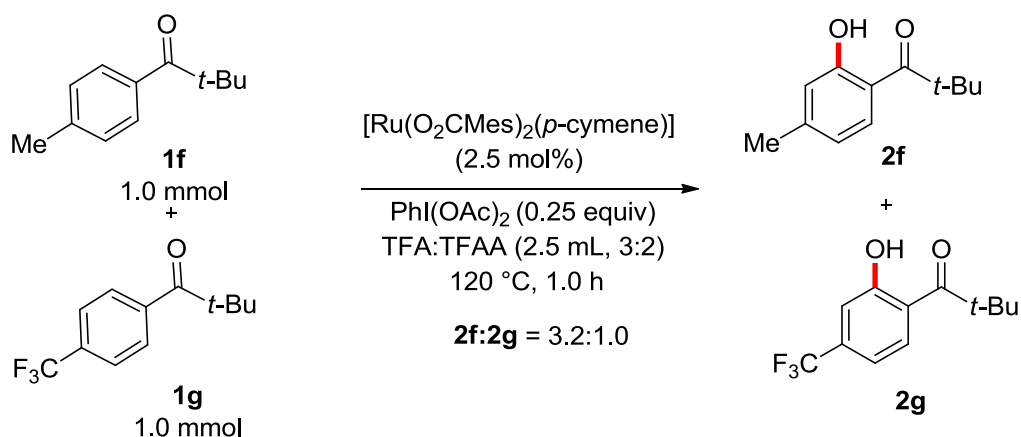

The mixture of 2,2-dimethyl-1-(*p*-tolyl)propan-1-one (**1f**), (176 mg, 1.00 mmol), 2,2-dimethyl-1-(4'-(trifluoromethyl)phenyl)propan-1-one (**1g**), (230 mg, 1.00 mmol), [Ru(O<sub>2</sub>CMes)<sub>2</sub>(*p*-cymene)] (14 mg, 2.5 mol %) and PhI(OAc)<sub>2</sub> (161 mg, 0.25 equiv) in TFA/TFAA (2.5 mL, 3:2) was stirred at 120 °C

under N<sub>2</sub> for 1 h. The reaction mixture was diluted with H<sub>2</sub>O (75 mL) and extracted with CH<sub>2</sub>Cl<sub>2</sub> (3 x 25 mL). The combined organic layers were washed with brine (50 mL) and dried over Na<sub>2</sub>SO<sub>4</sub>. After filtration and evaporation of the solvents *in vacuo*, the ratio of products **2f:2g** was found to be 3.2:1.0 by <sup>1</sup>H-NMR spectroscopy.

### Intermolecular Competition Experiments between Ketones **1a** and **1i**

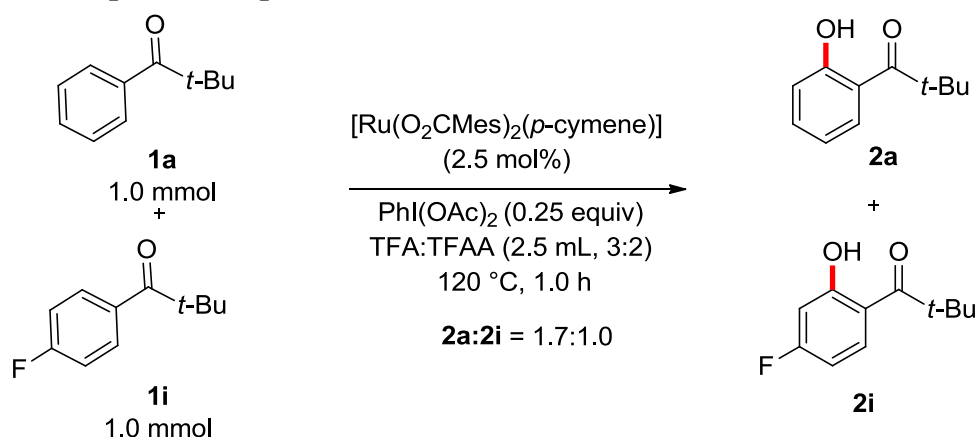

The mixture of 2,2-dimethyl-1-phenylpropan-1-one (**1a**), (162 mg, 1.00 mmol), 1-(4'-fluorophenyl)-2,2-dimethylpropan-1-one (**1i**), (180 mg, 1.00 mmol),  $[\text{Ru}(\text{O}_2\text{CMes})_2(p\text{-cymene})]$  (14 mg, 2.5 mol %) and  $\text{PhI}(\text{OAc})_2$  (161 mg, 0.25 equiv) in TFA/TFAA (2.5 mL, 3:2) was stirred at 120 °C under N<sub>2</sub> for 1 h. The reaction mixture was diluted with H<sub>2</sub>O (75 mL) and extracted with CH<sub>2</sub>Cl<sub>2</sub> (3 x 25 mL). The combined organic layers were washed with brine (50 mL) and dried over Na<sub>2</sub>SO<sub>4</sub>. After filtration and evaporation of the solvents *in vacuo*, the ratio of products **2a:2i** was found to be 1.7:1.0 by <sup>1</sup>H-NMR spectroscopy.

## References

1. Ushijima, S.; Dohi, S.; Moriyama, K.; Togo, H. *Tetrahedron* **2012**, *68*, 1436–1442.
2. Fujihara, T.; Semba, K.; Terao, J.; Tsuji, Y. *Angew. Chem. Int. Ed.* **2010**, *49*, 1472–1476.
3. Mercier, E. A.; Smith, C. D.; Parvez, M.; Back, T. G. *J. Org. Chem.* **2012**, *77*, 3508–3517.
4. Donnelly, J. A.; Kerr, P. A.; O'Boyle, P. *Tetrahedron* **1973**, *29*, 3979–3983.
5. Cimarrelli, C.; Palmieri, G. *Tetrahedron* **1998**, *54*, 15711–15720.
6. Rao, H.; Li, C.-J. *Angew. Chem. Int. Ed.* **2011**, *50*, 8936–8939.
7. Chen, C.; Feng, X.; Zhang, G.; Zhao, Q.; Huang, G. *Synthesis* **2008**, 3205–3208.

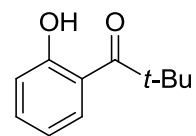

**2a**  
(300 MHz, CDCl<sub>3</sub>)

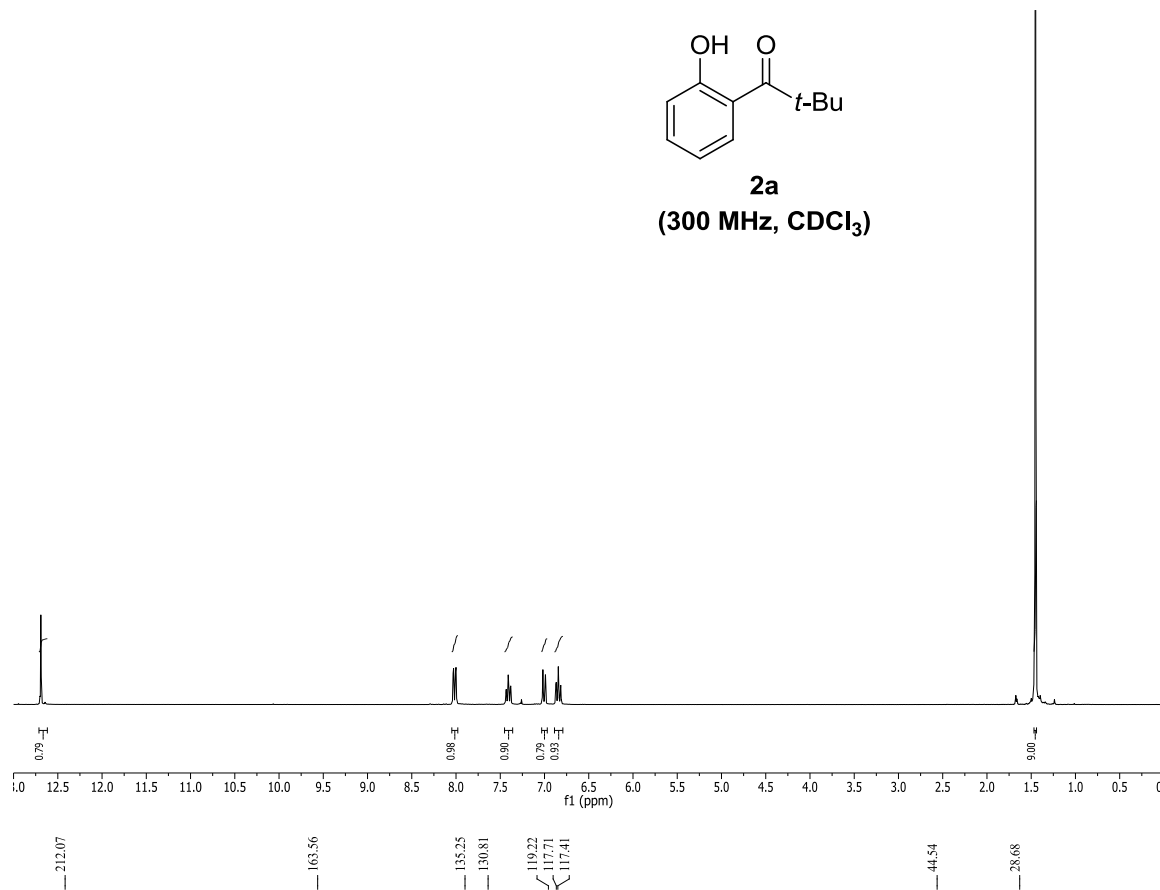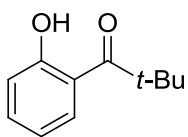

**2a**  
(75 MHz, CDCl<sub>3</sub>)

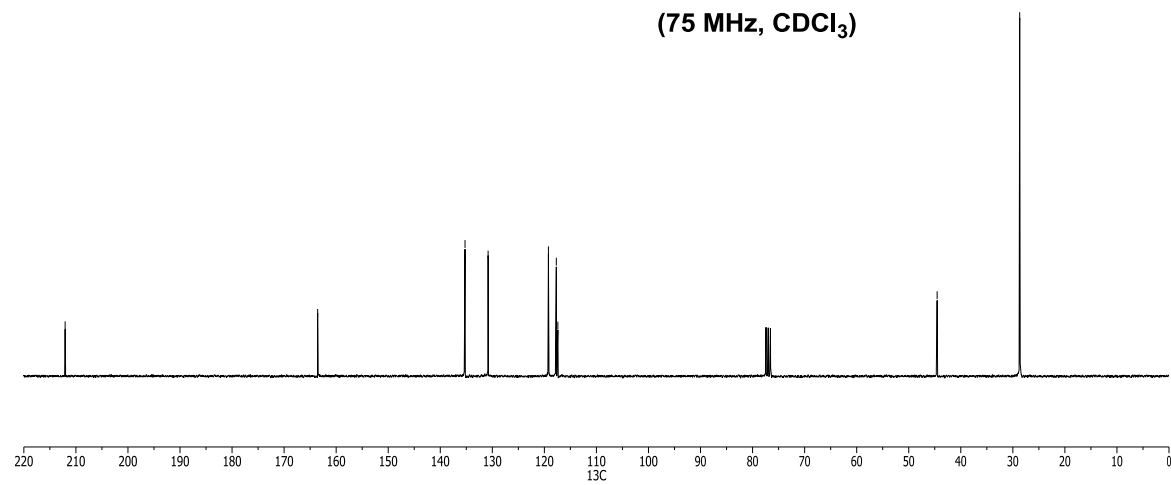



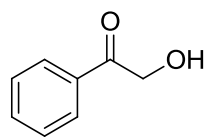

**2b'**  
(300 MHz, CDCl<sub>3</sub>)

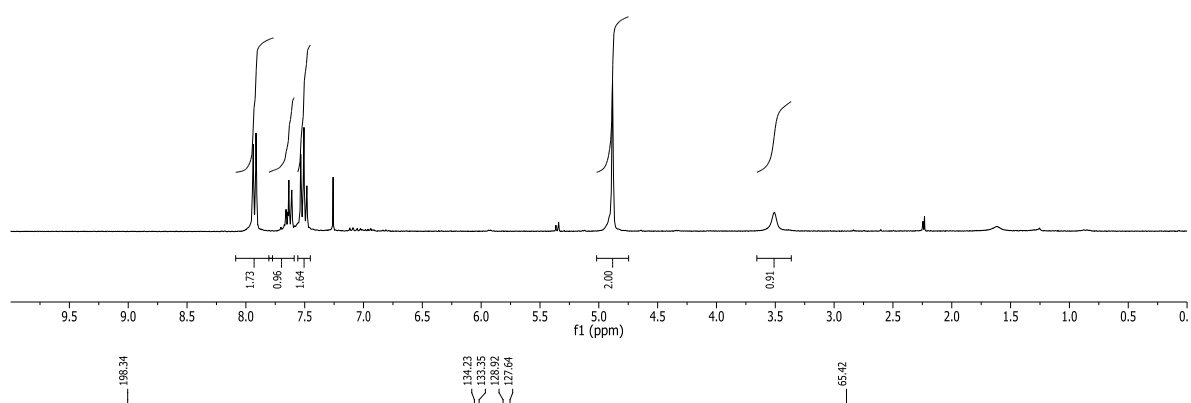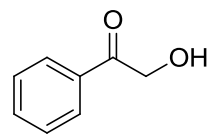

**2b'**  
(75 MHz, CDCl<sub>3</sub>)

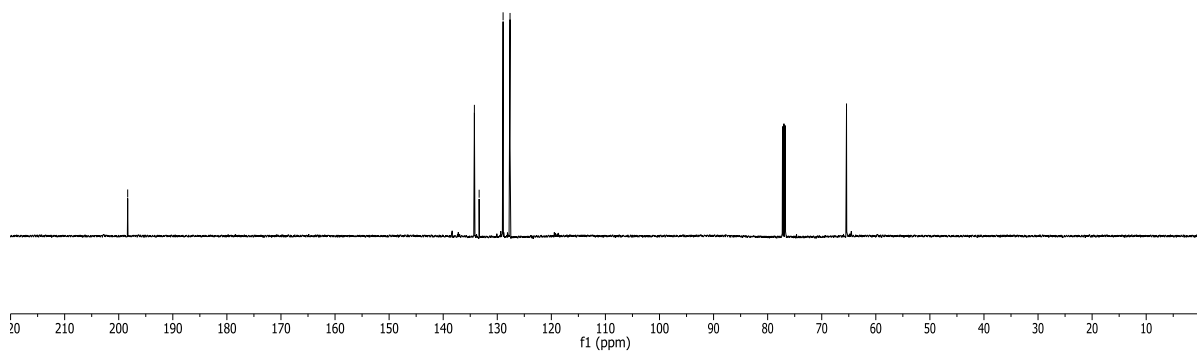

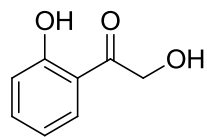

**2b**  
(300 MHz, CDCl<sub>3</sub>)

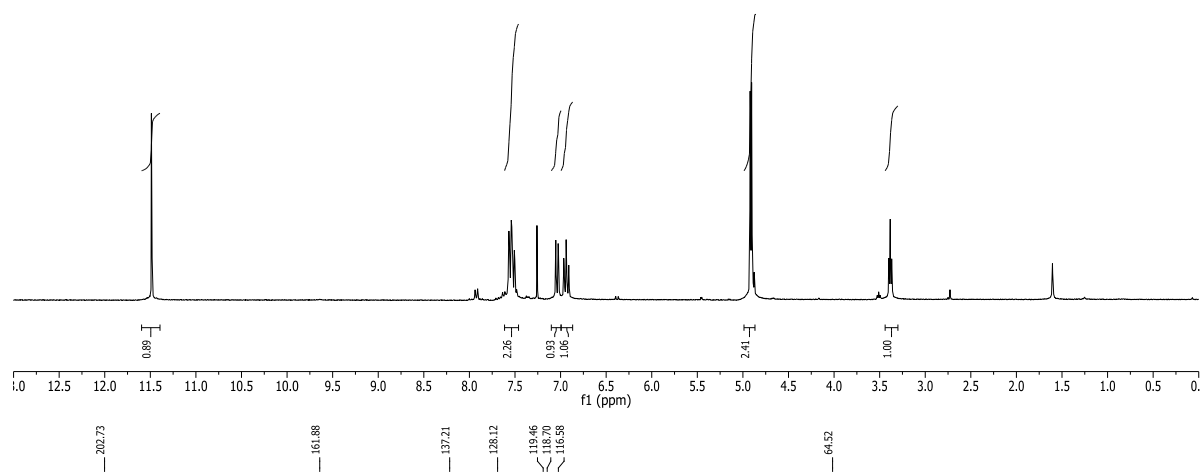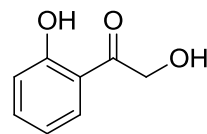

**2b**  
(75 MHz, CDCl<sub>3</sub>)

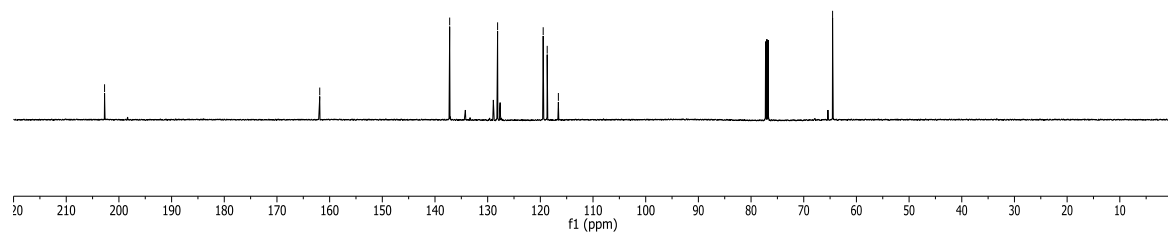

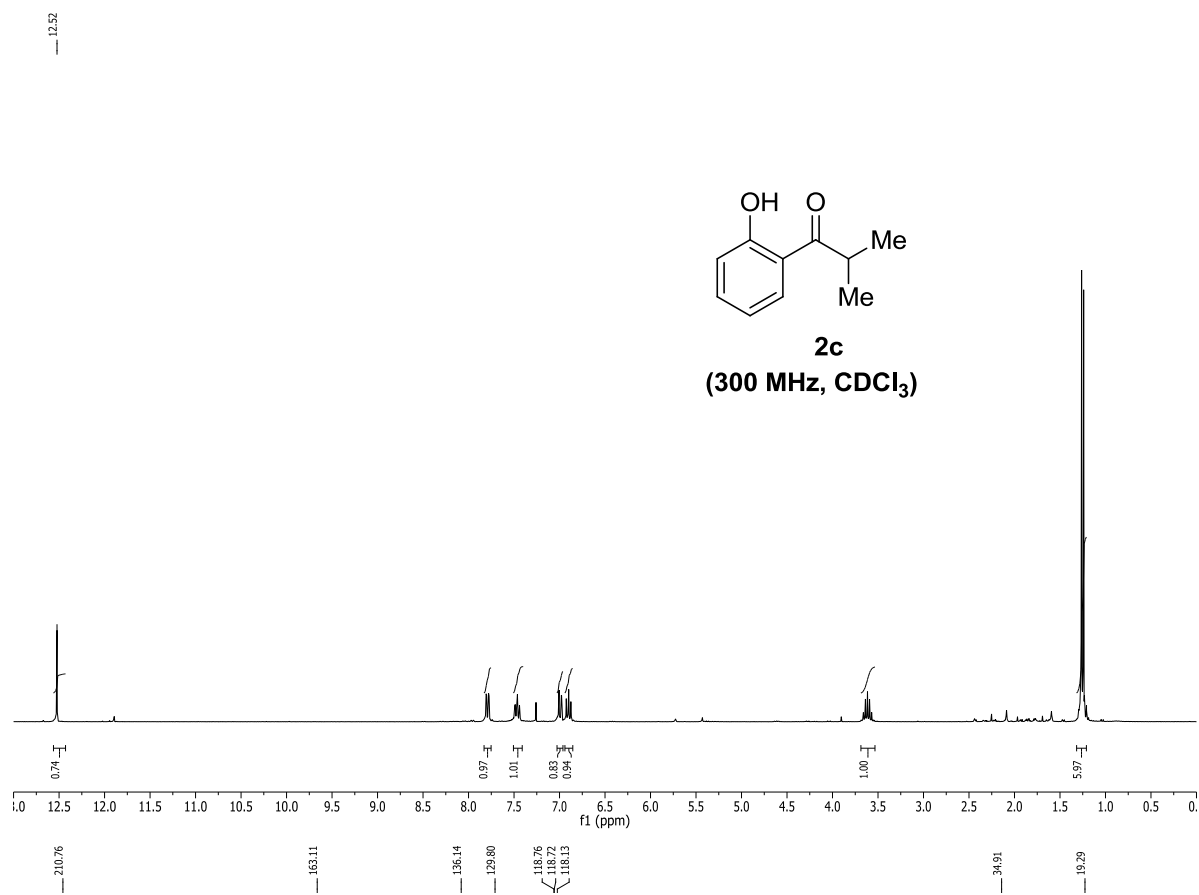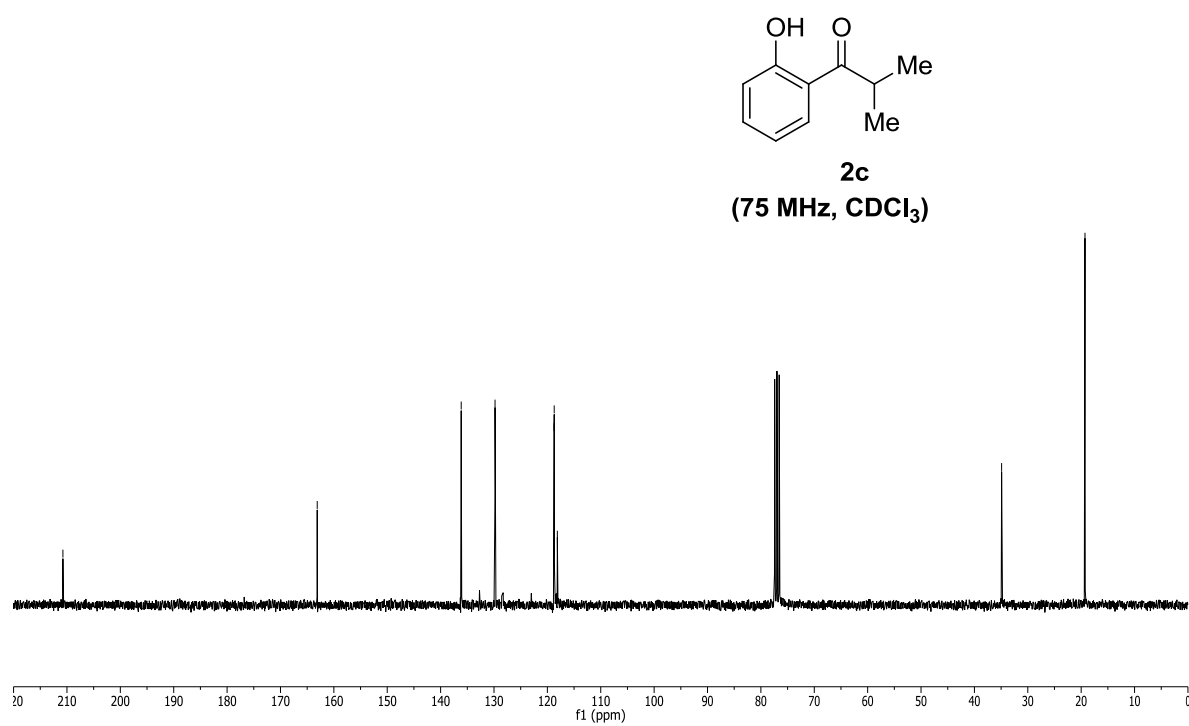

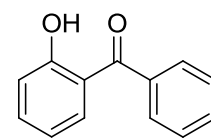

**2d**  
(300 MHz, CDCl<sub>3</sub>)

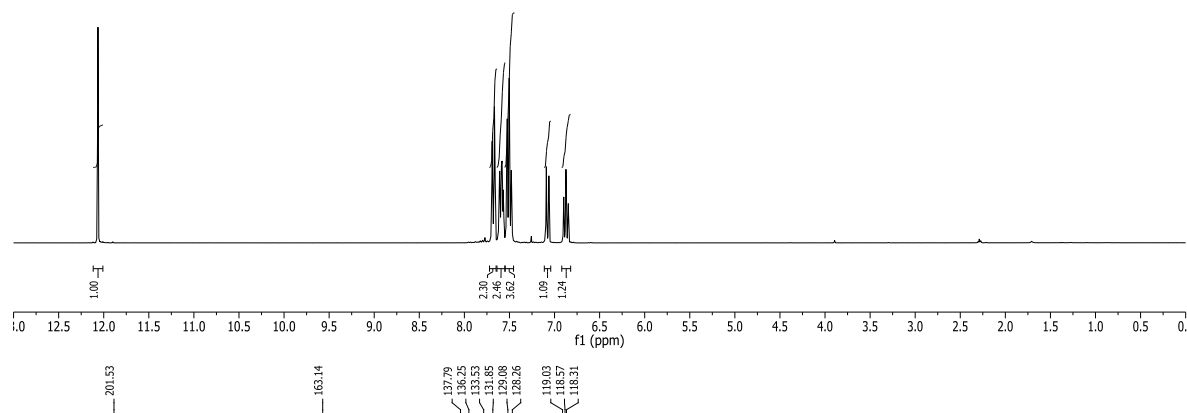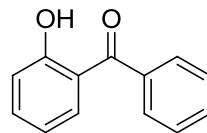

**2d**  
(75 MHz, CDCl<sub>3</sub>)

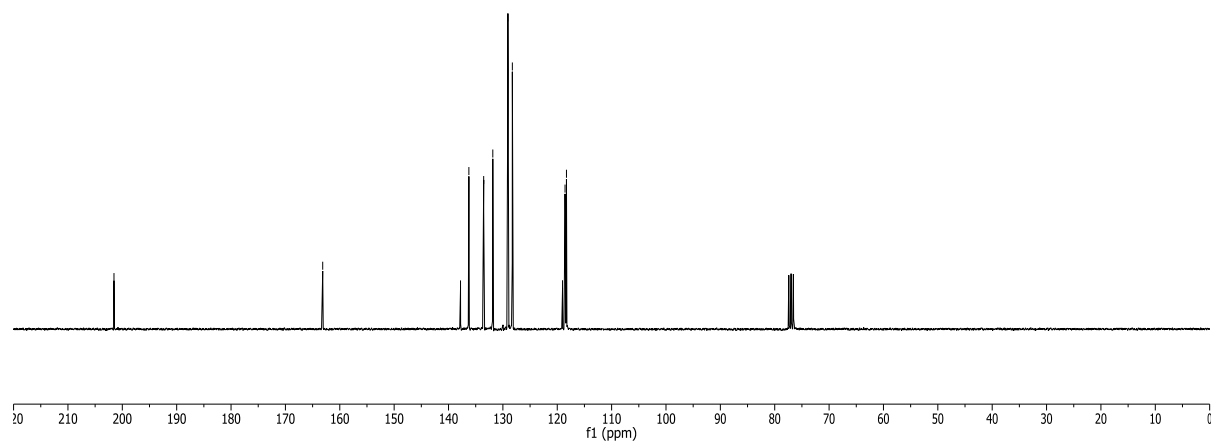

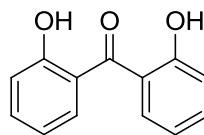

**2d'**  
(300 MHz, CDCl<sub>3</sub>)

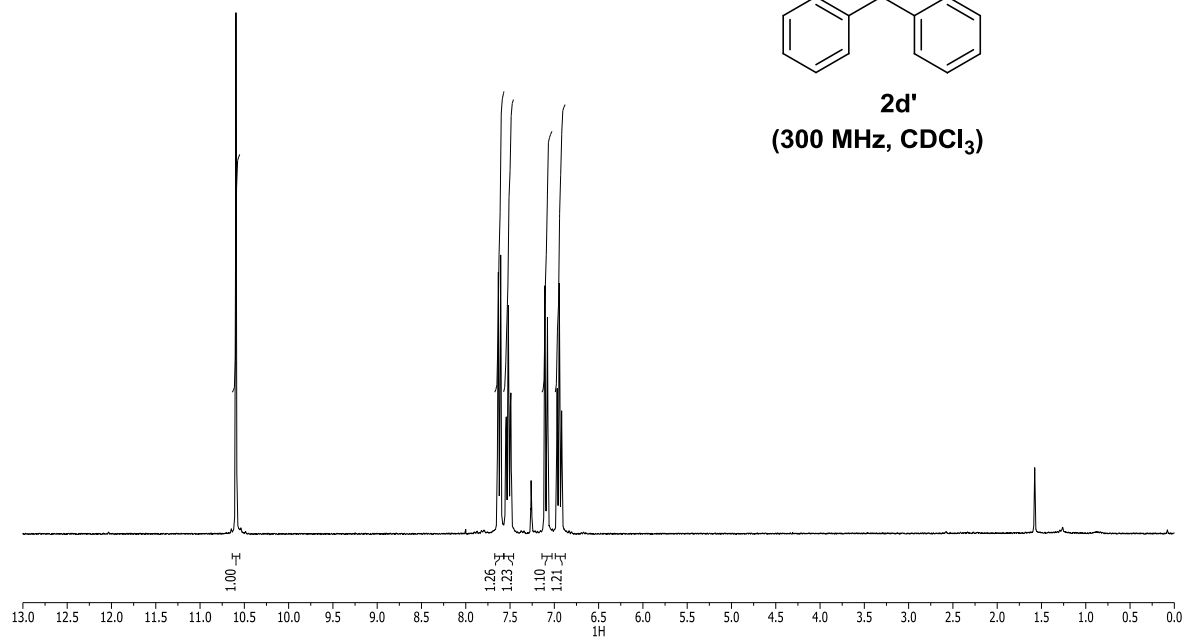

202.34  
161.70  
135.89  
133.03  
119.81  
118.83  
118.56

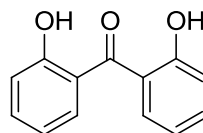

**2d'**  
(75 MHz, CDCl<sub>3</sub>)

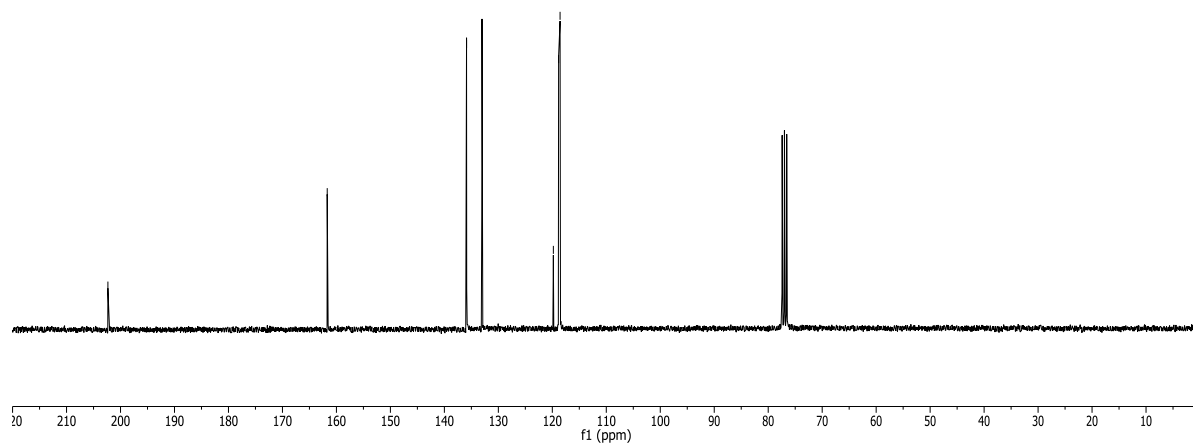

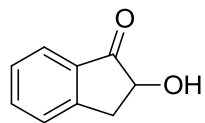

**2e**  
(300 MHz, CDCl<sub>3</sub>)

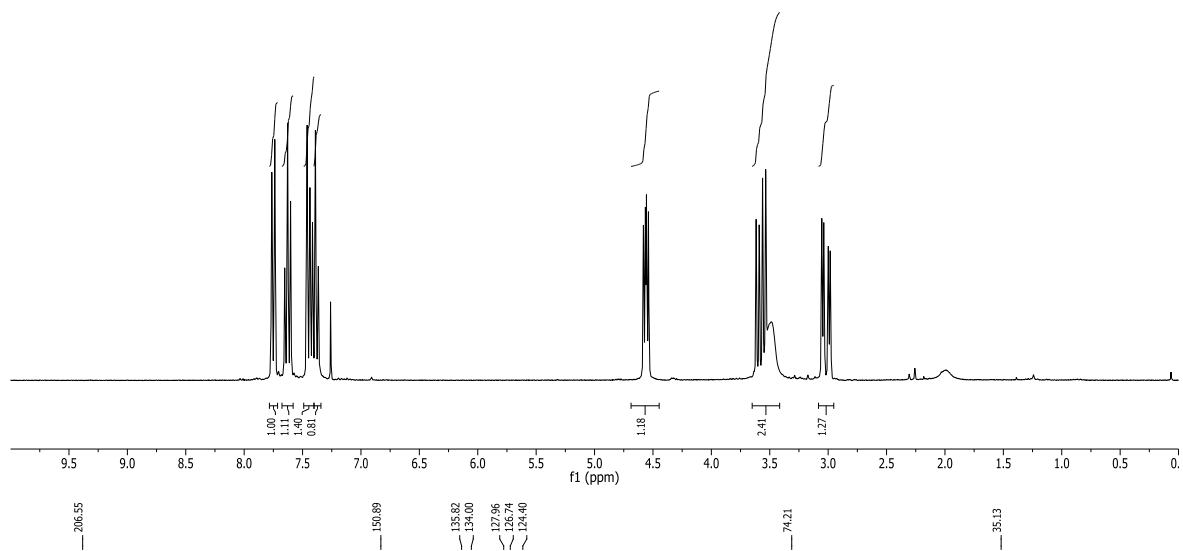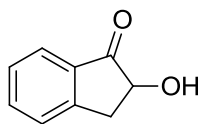

**2e**  
(75 MHz, CDCl<sub>3</sub>)

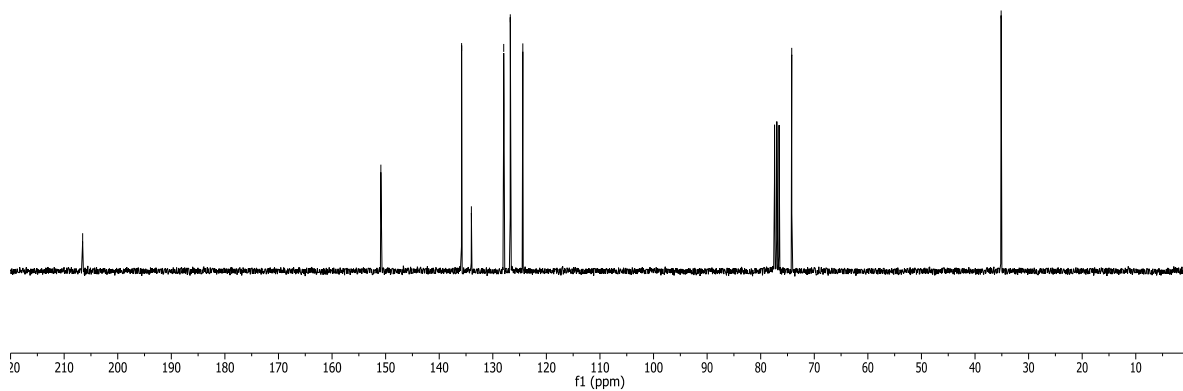

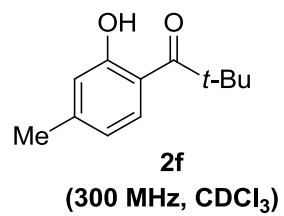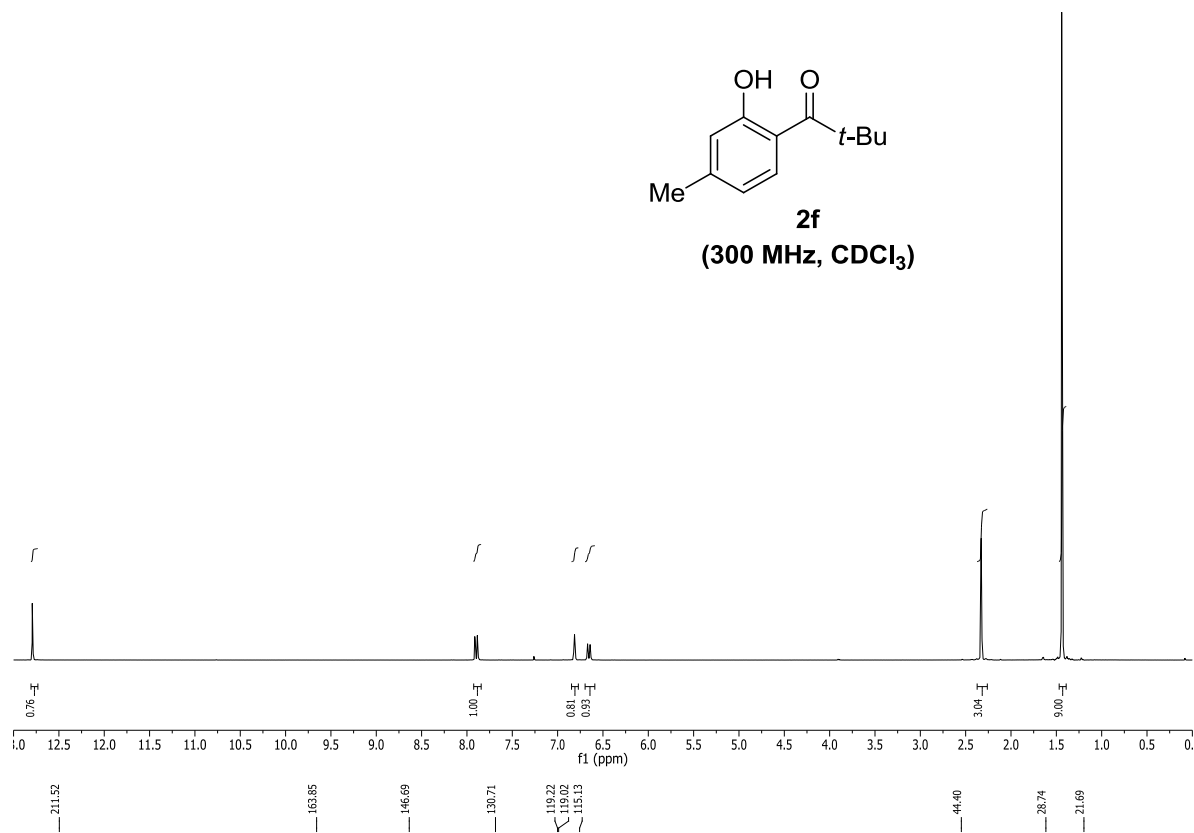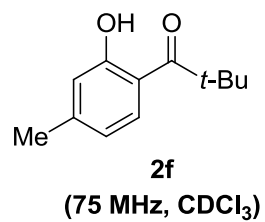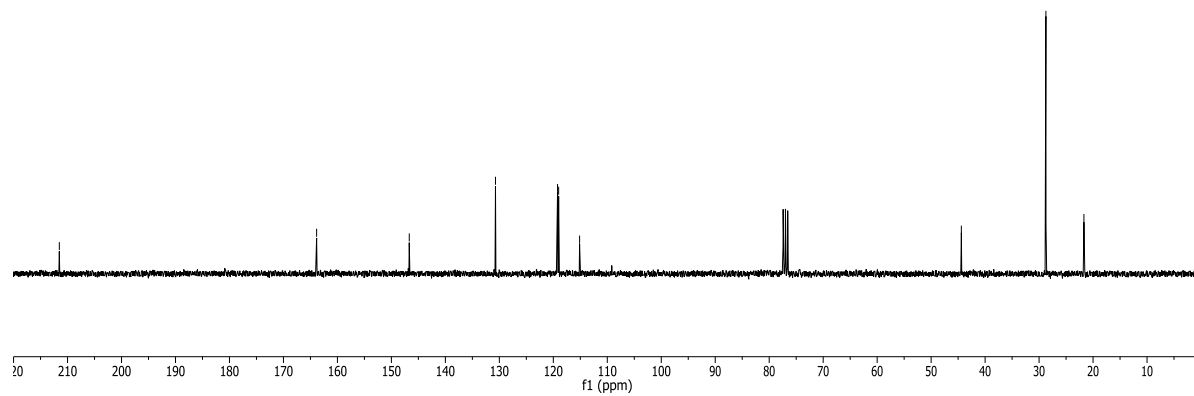

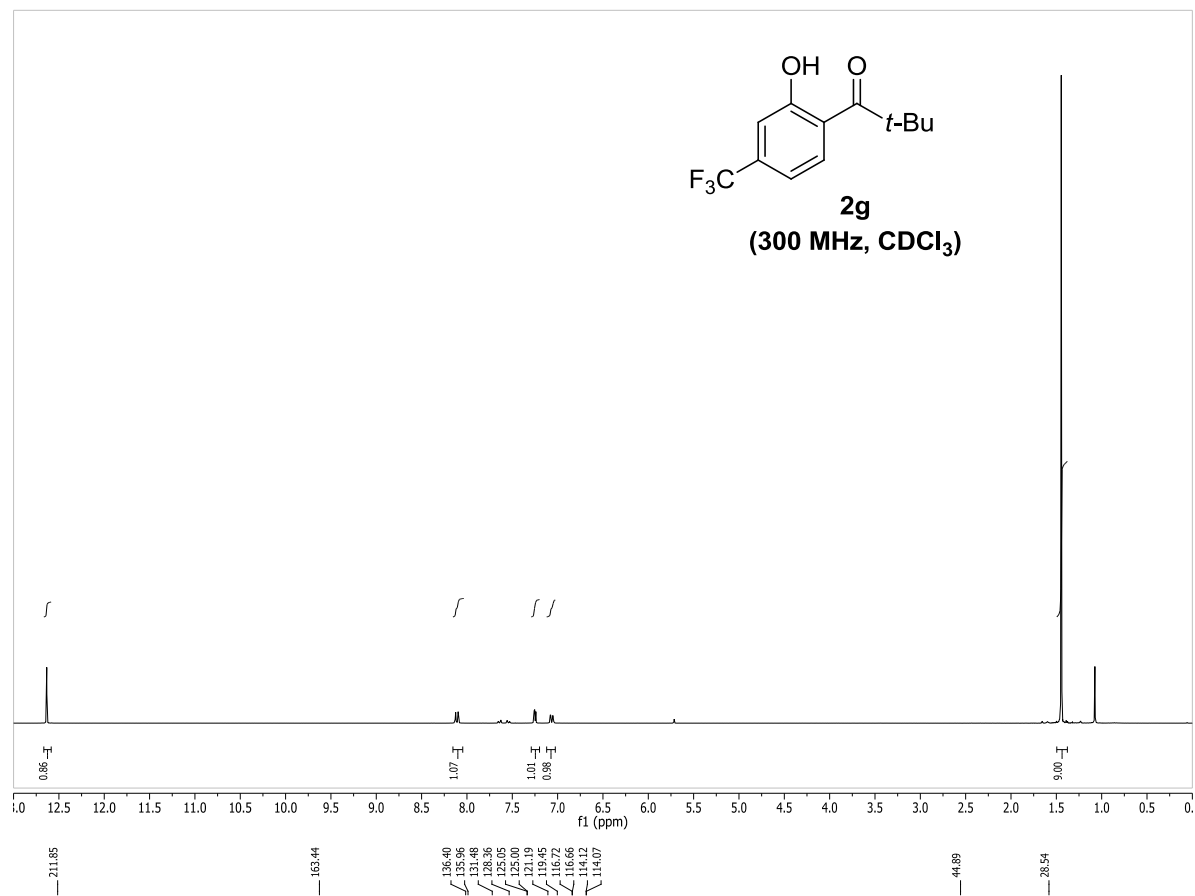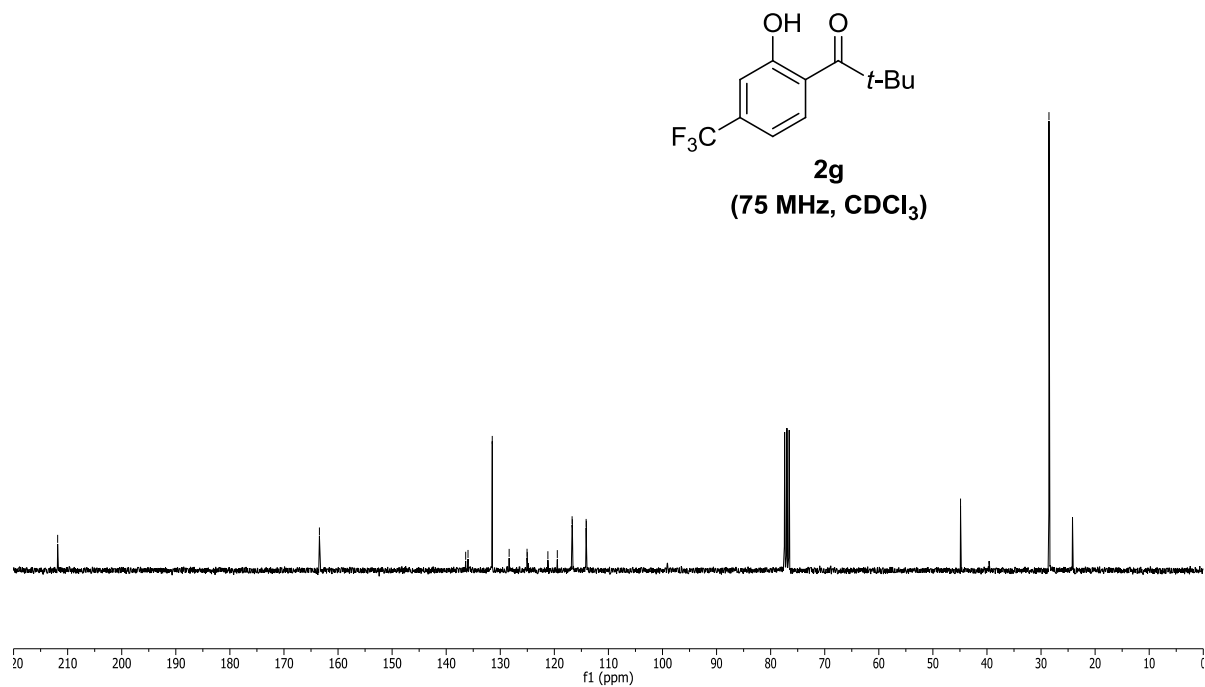



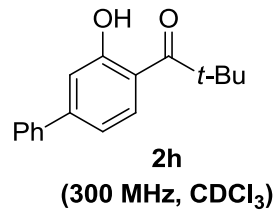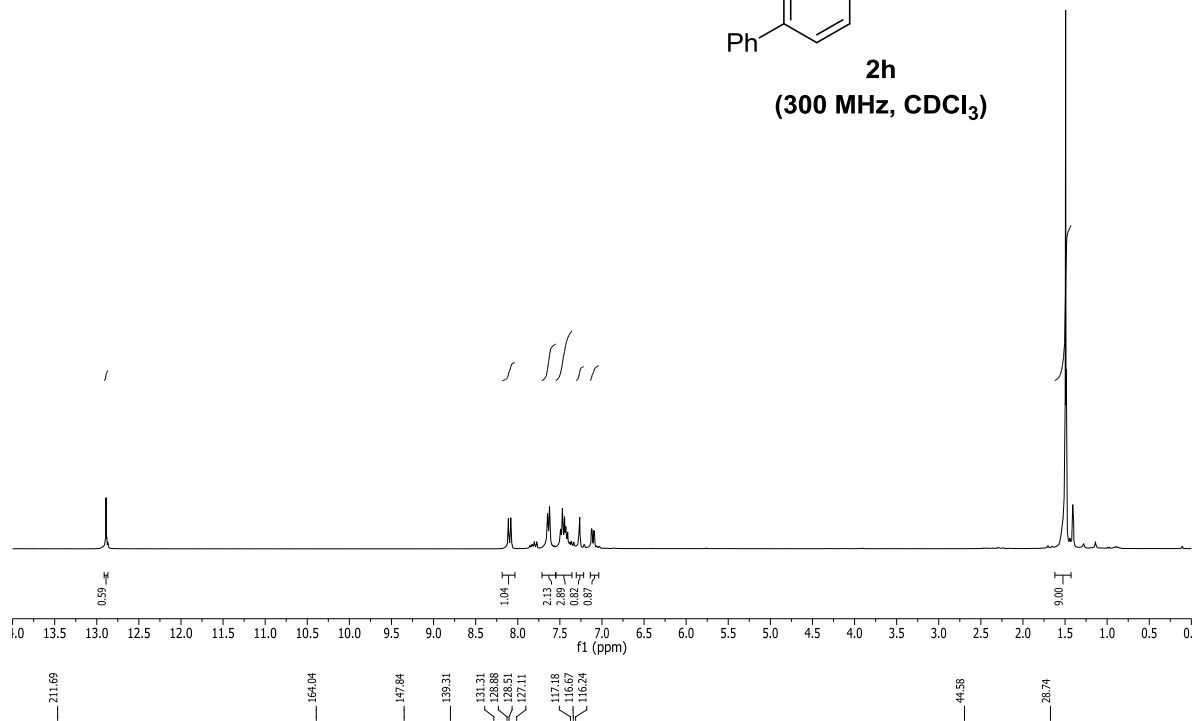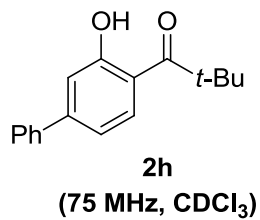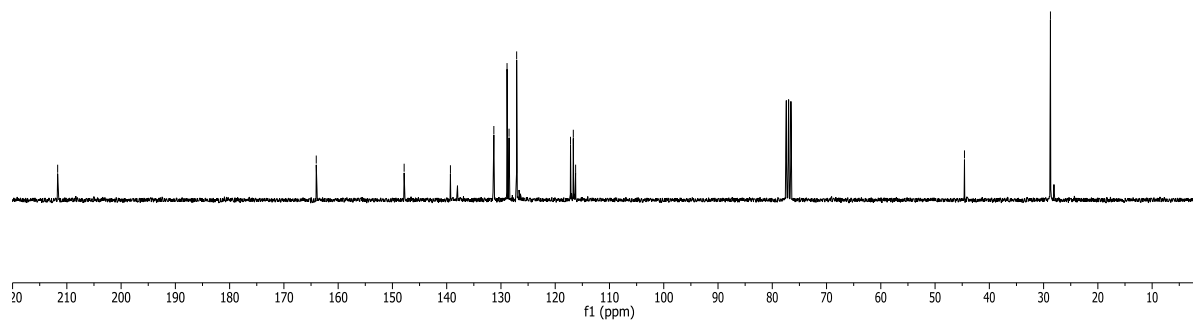

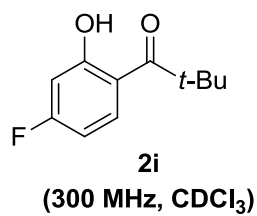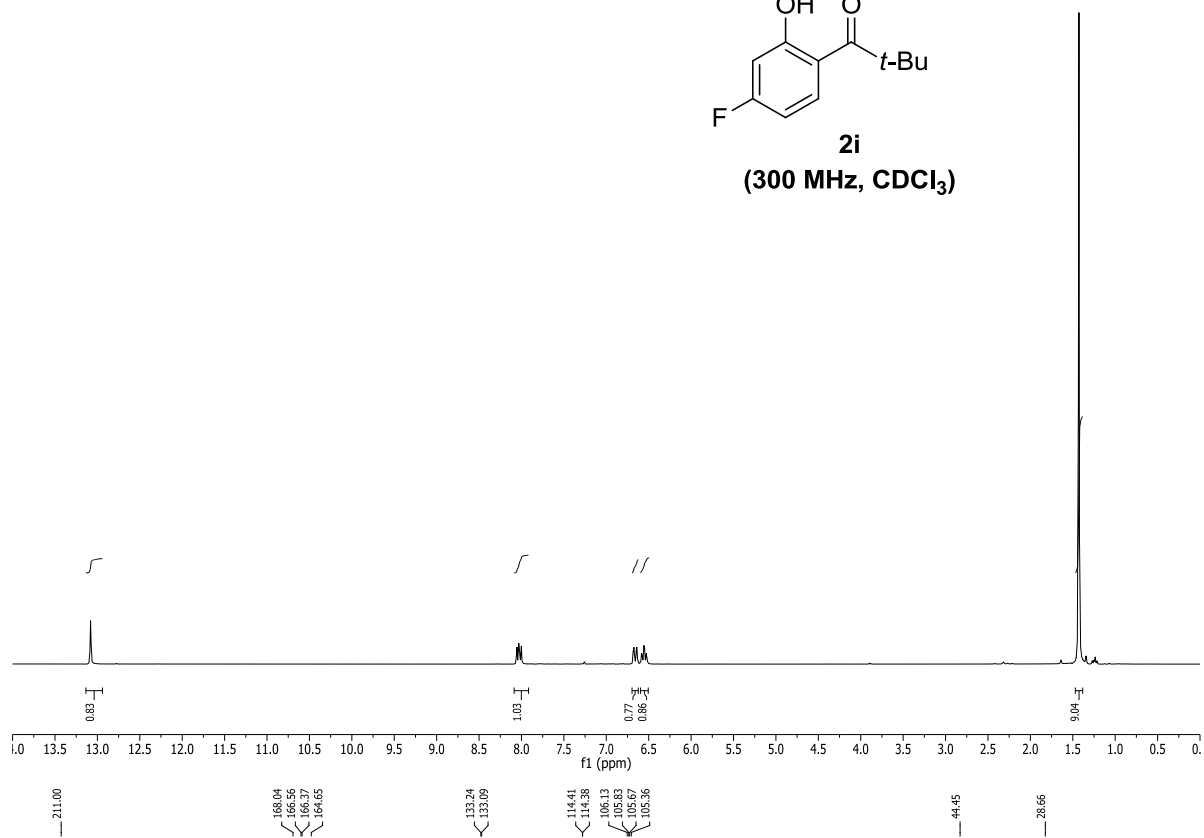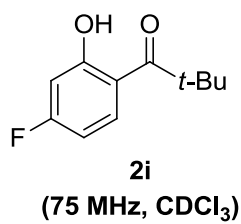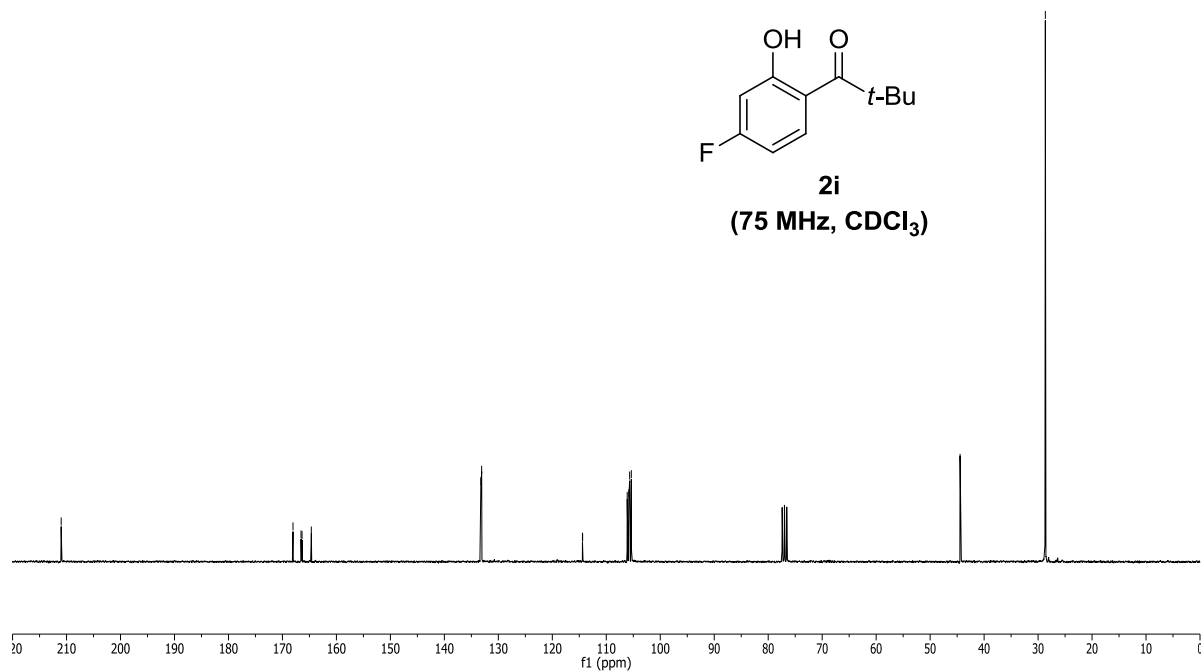

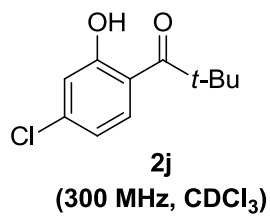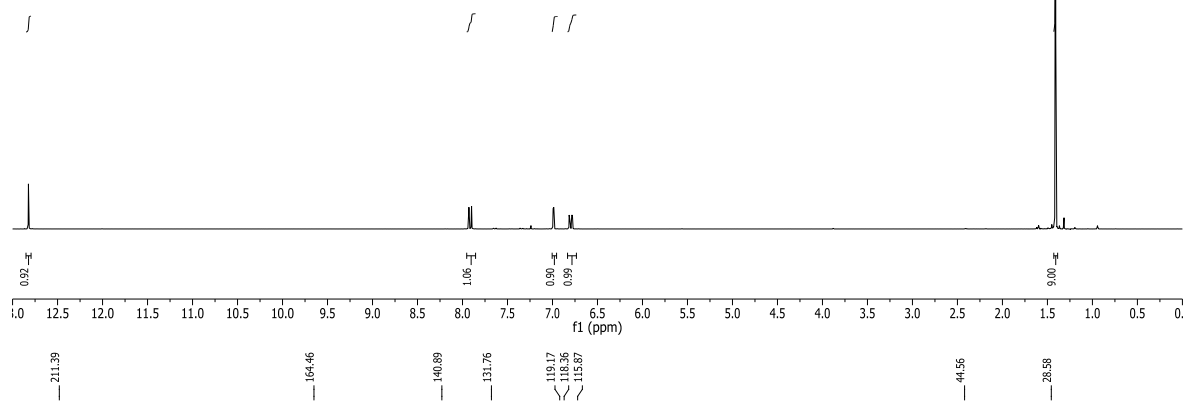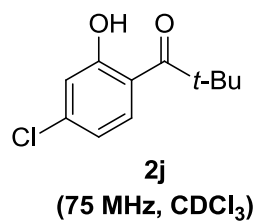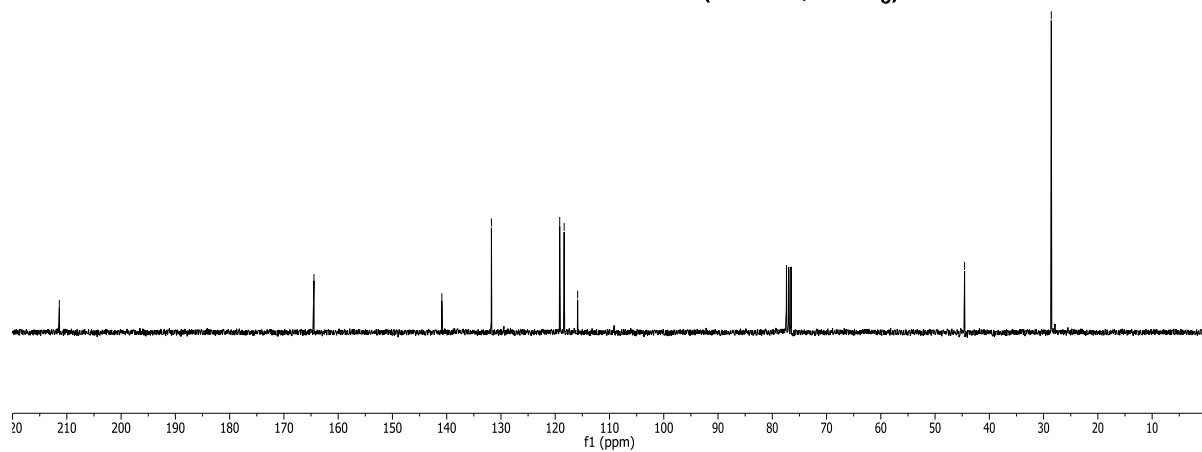

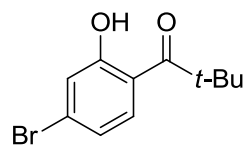

**2k**  
(300 MHz, CDCl<sub>3</sub>)

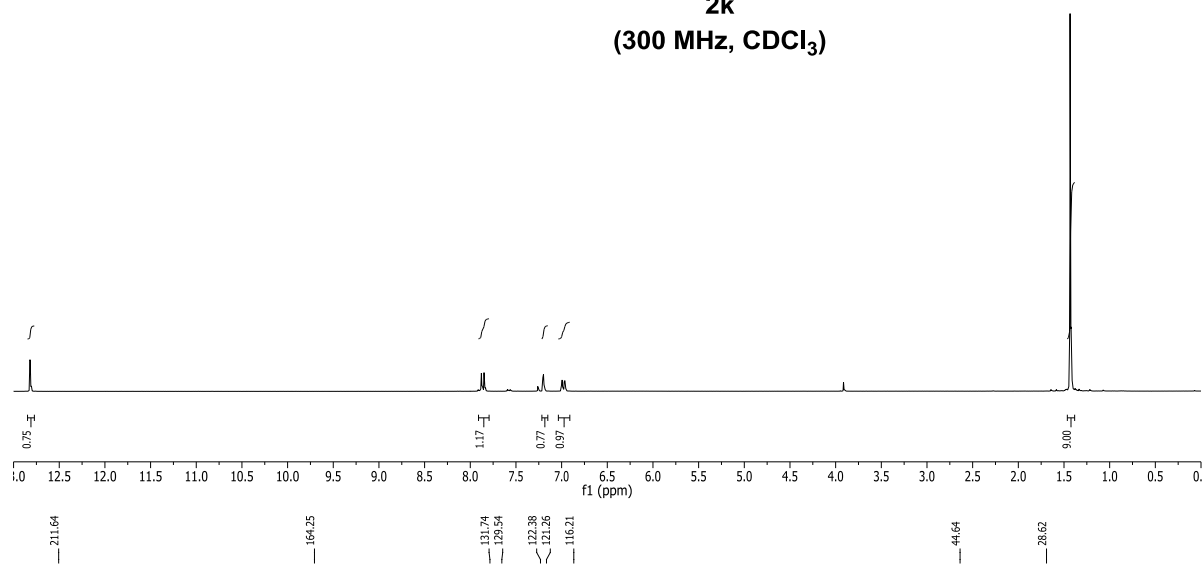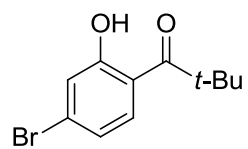

**2k**  
(75 MHz, CDCl<sub>3</sub>)

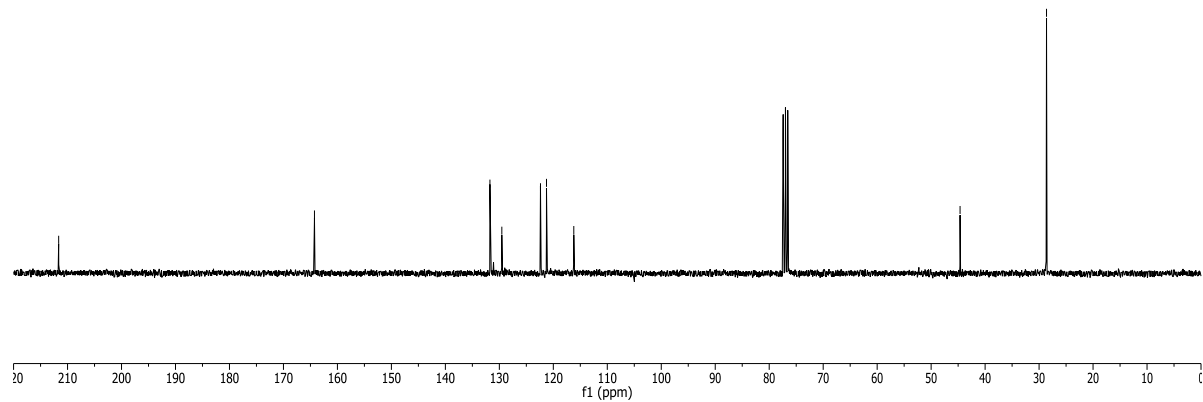

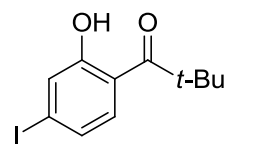

**2I**  
(300 MHz, CDCl<sub>3</sub>)

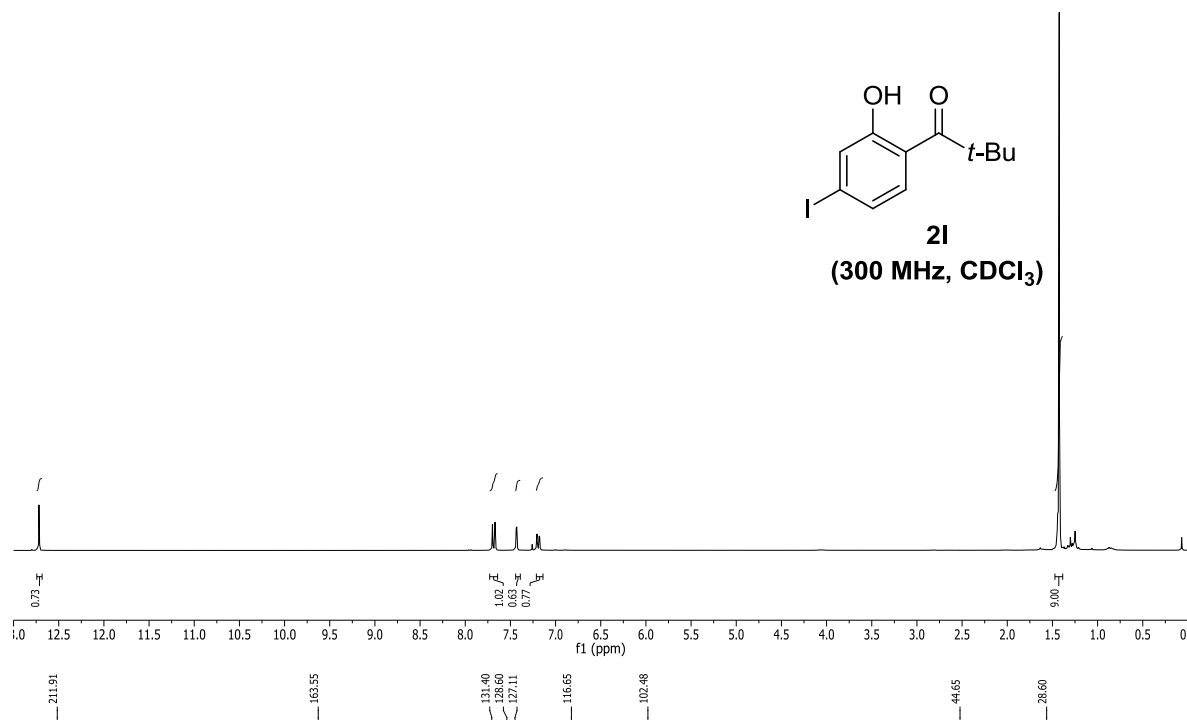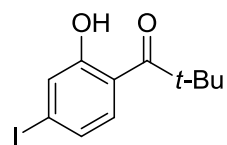

**2I**  
(75 MHz, CDCl<sub>3</sub>)

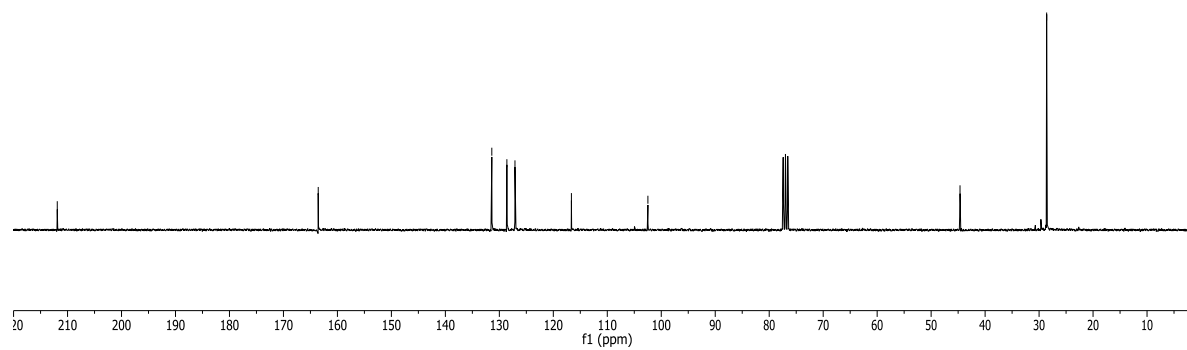

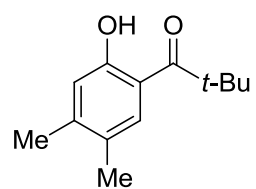

**2m**  
(300 MHz, CDCl<sub>3</sub>)

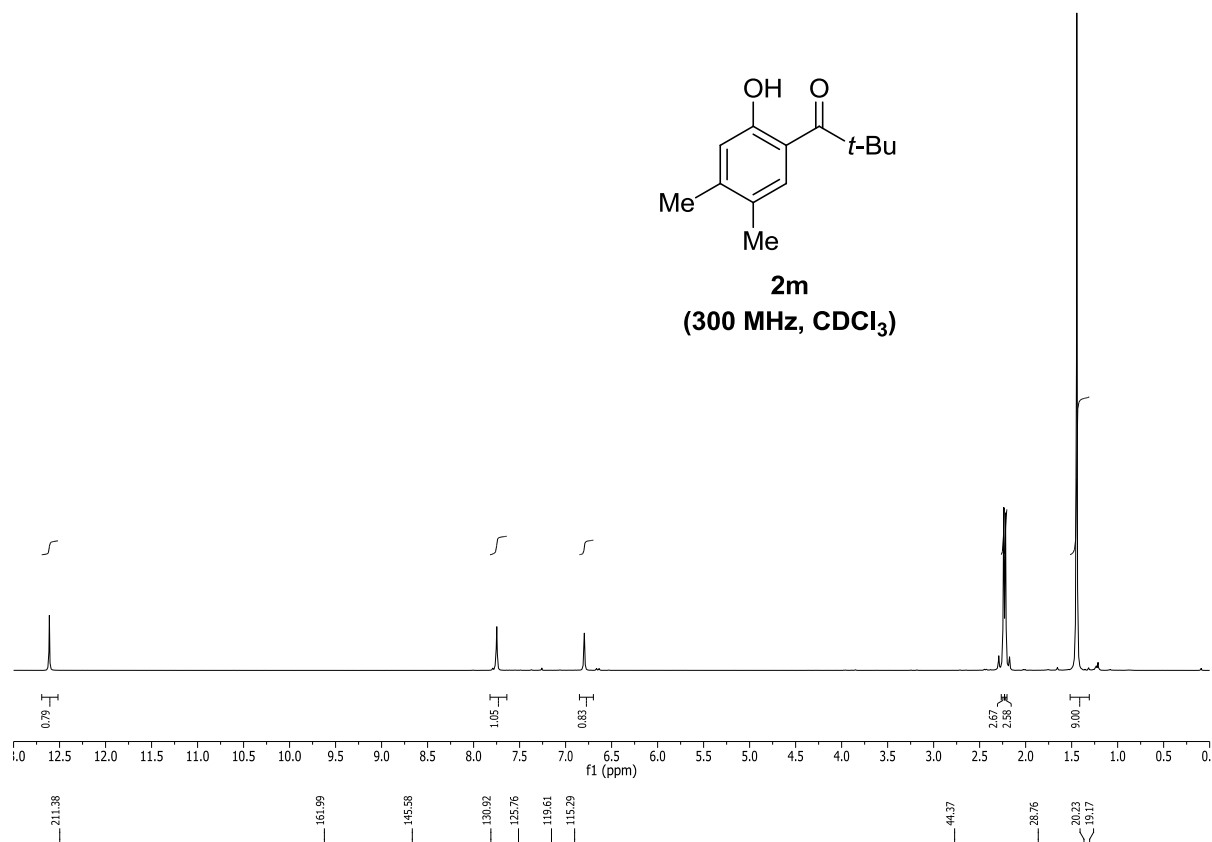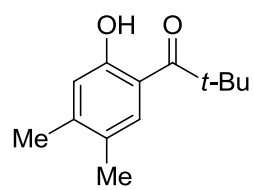

**2m**  
(75 MHz, CDCl<sub>3</sub>)

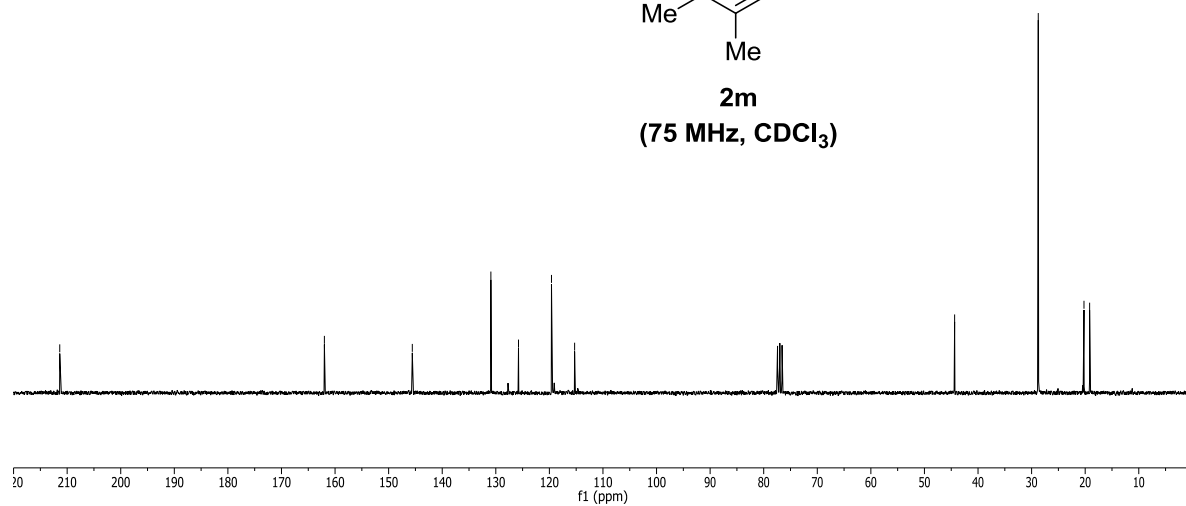

## Crude spectra of **2m**

vst-559crude\_3h  
vst-559crude cdcl3  
thiru / ack

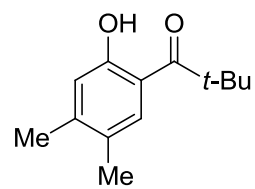

**2m**  
(300 MHz, CDCl<sub>3</sub>)

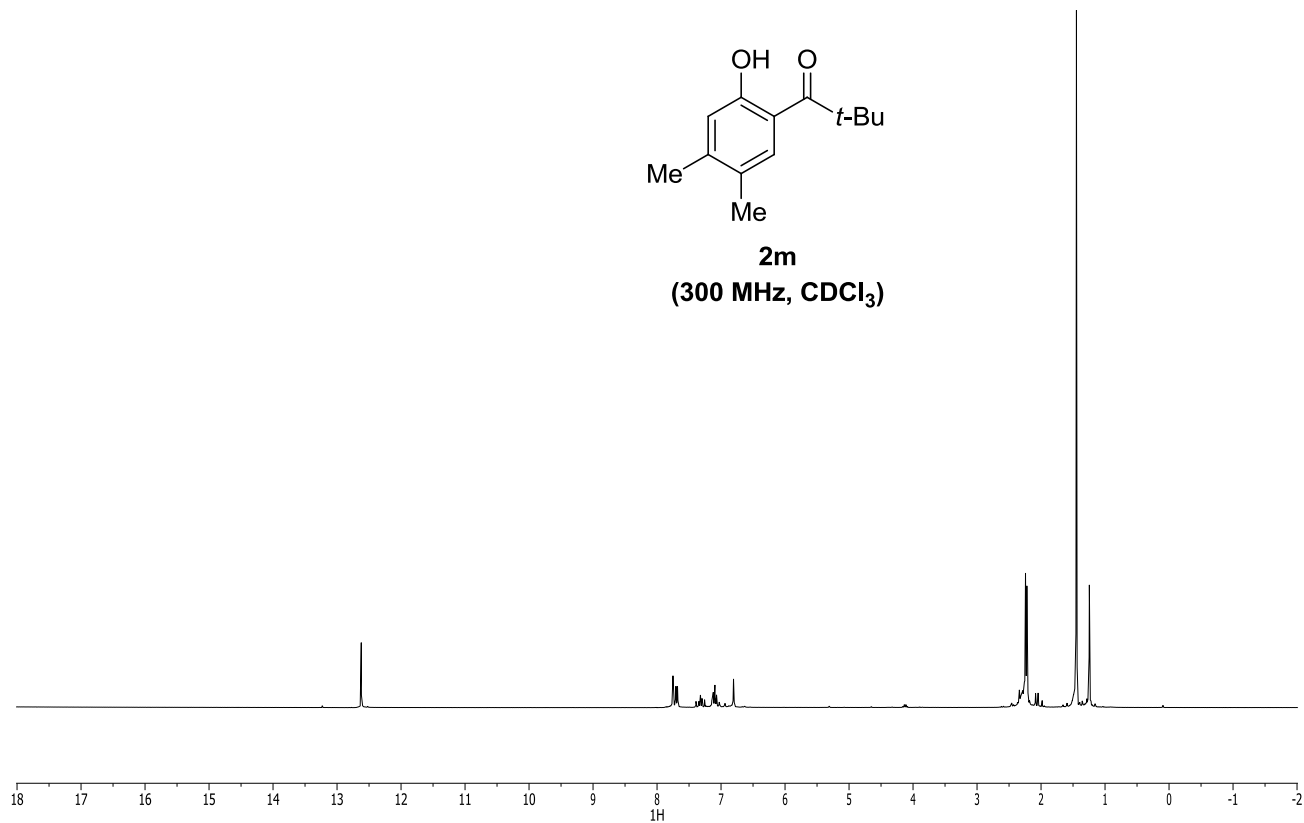

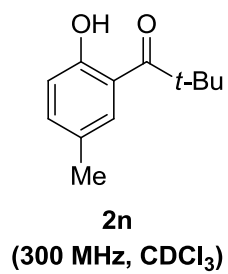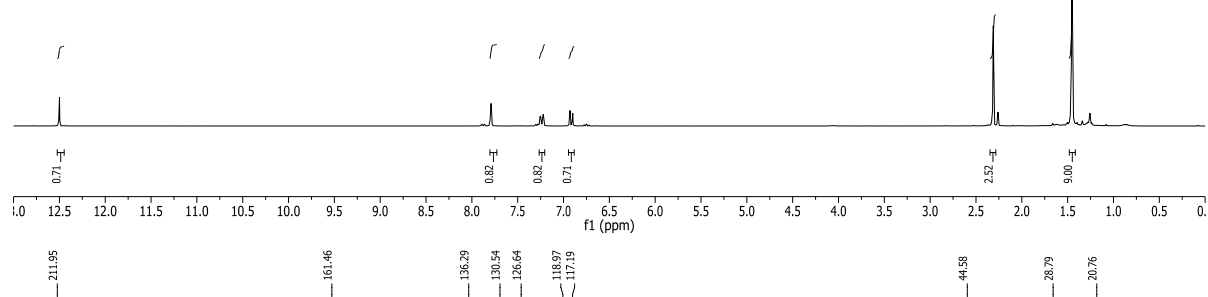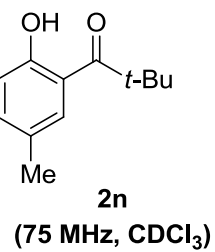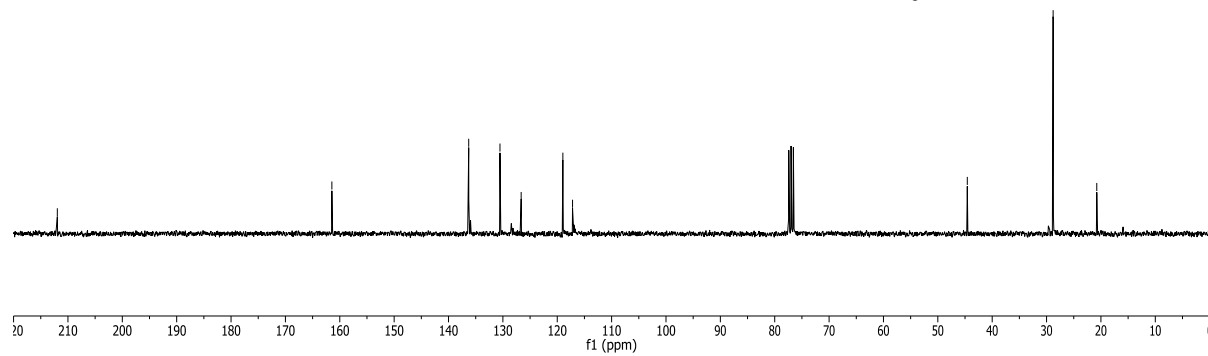



## Crude spectra of **2n**

vst-558c\_3h  
vst-558c cdd3  
thiru / ack

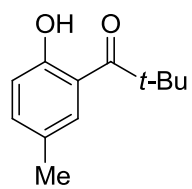

**2n**  
(300 MHz, CDCl<sub>3</sub>)

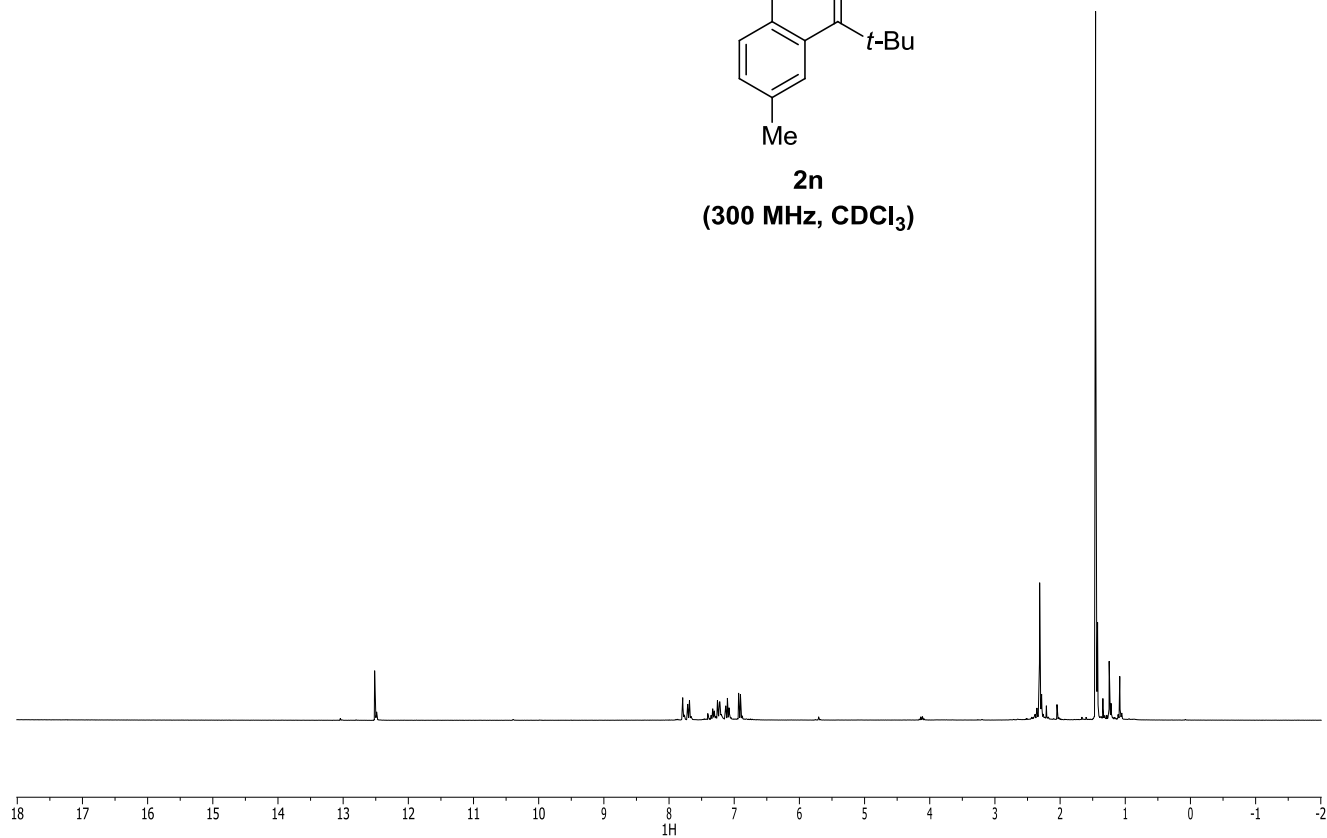

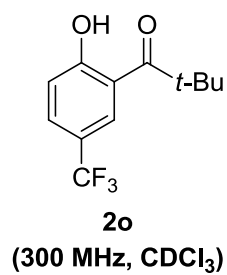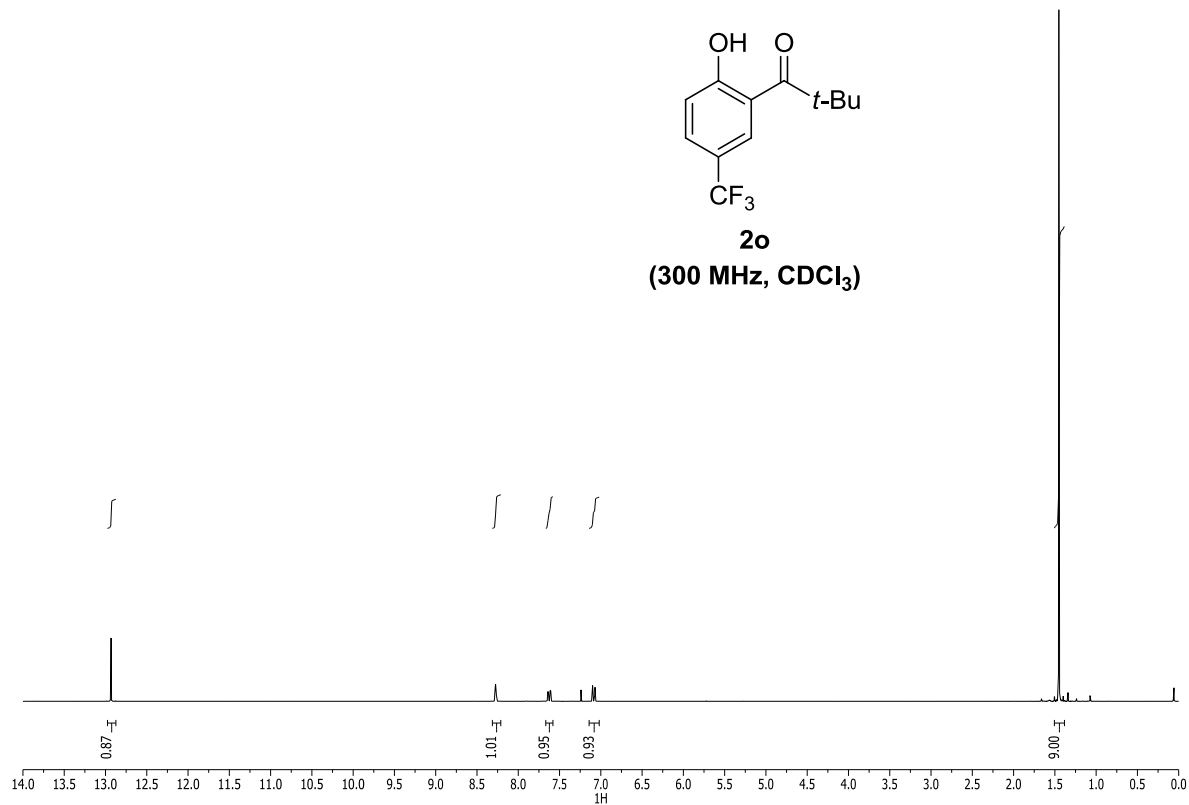

211.68

165.99

131.71  
 131.67  
 131.63  
 131.58  
 128.34  
 128.29  
 128.23  
 128.18  
 125.67  
 122.07  
 120.31  
 120.15  
 119.87  
 116.64

44.75

28.64

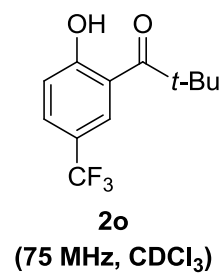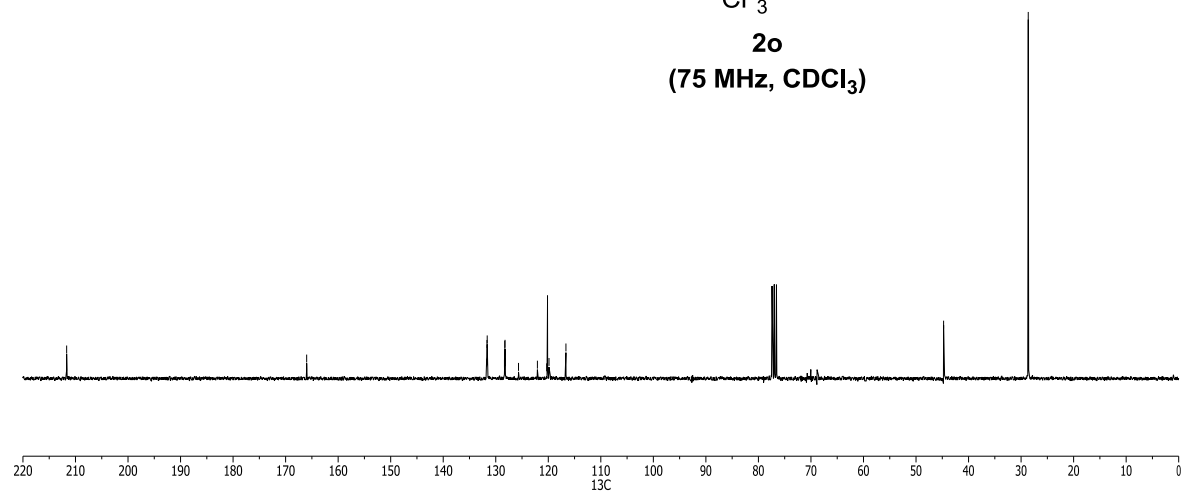

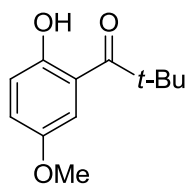

**2p**  
(300 MHz, CDCl<sub>3</sub>)

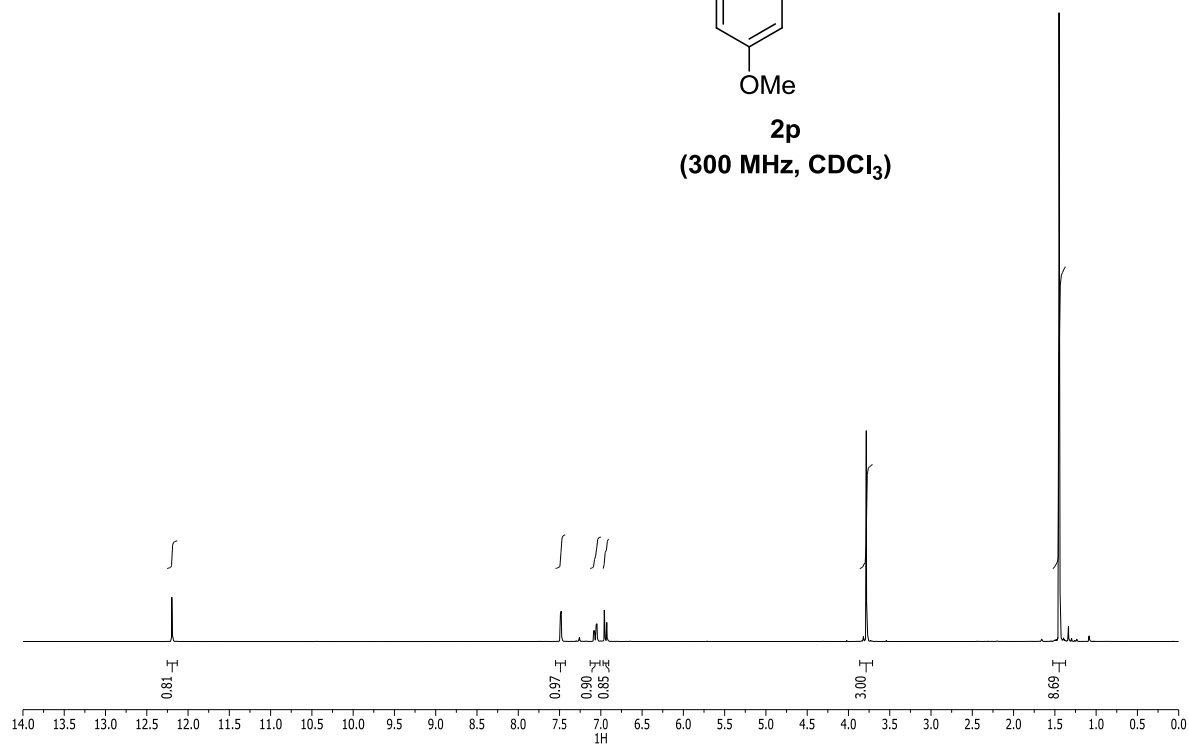

211.52

157.80

150.58

122.72

119.78

117.03

114.49

55.93

44.55

28.69

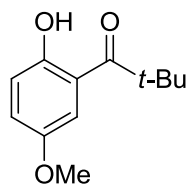

**2p**  
(300 MHz, CDCl<sub>3</sub>)

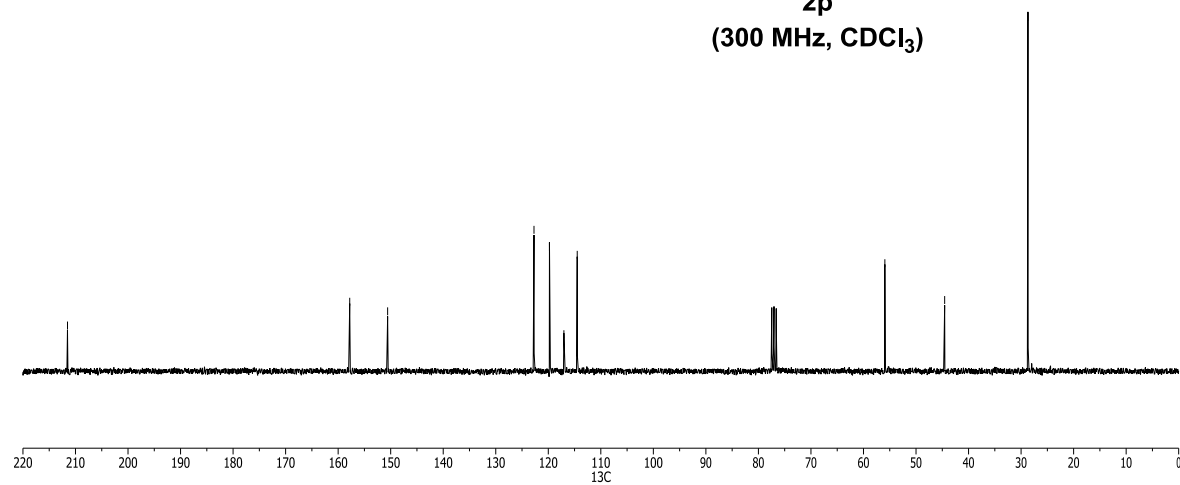

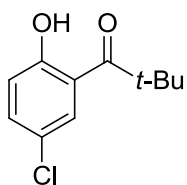

**2q'**  
(300 MHz, CDCl<sub>3</sub>)

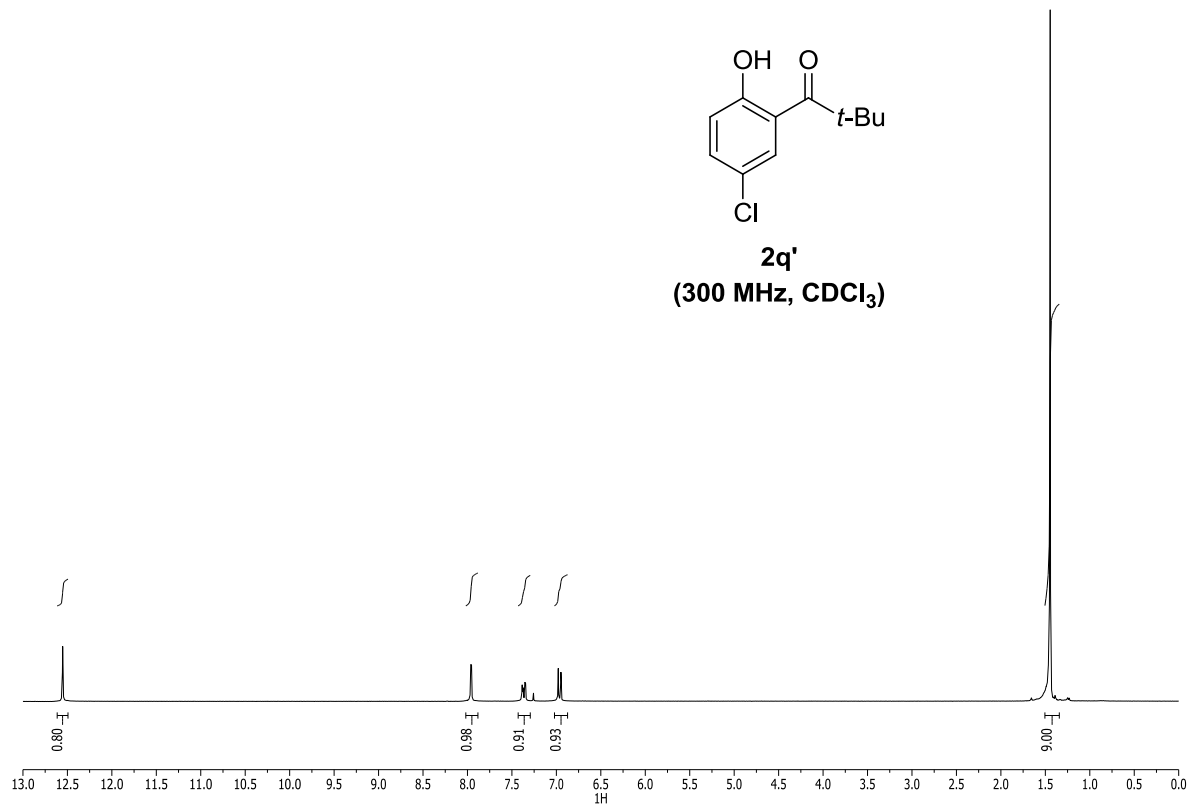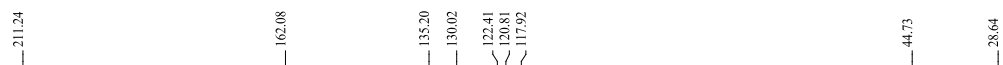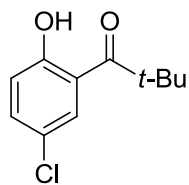

**2q''**  
(75 MHz, CDCl<sub>3</sub>)

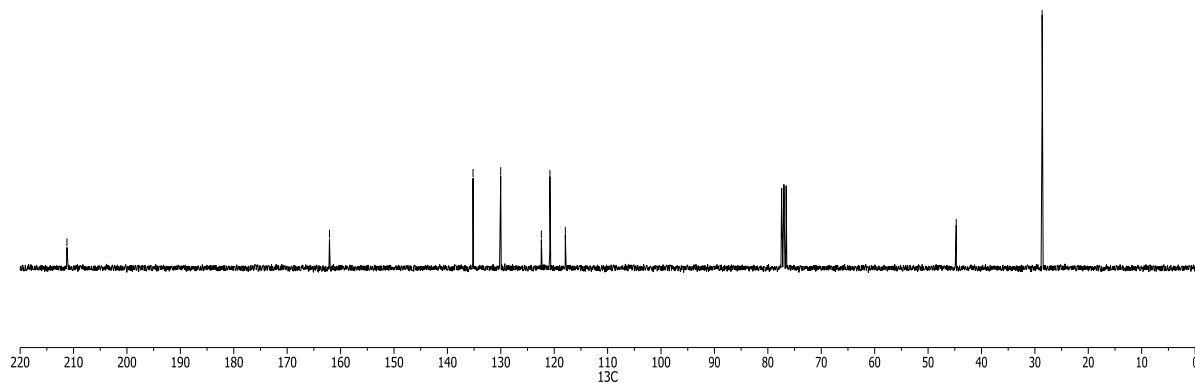

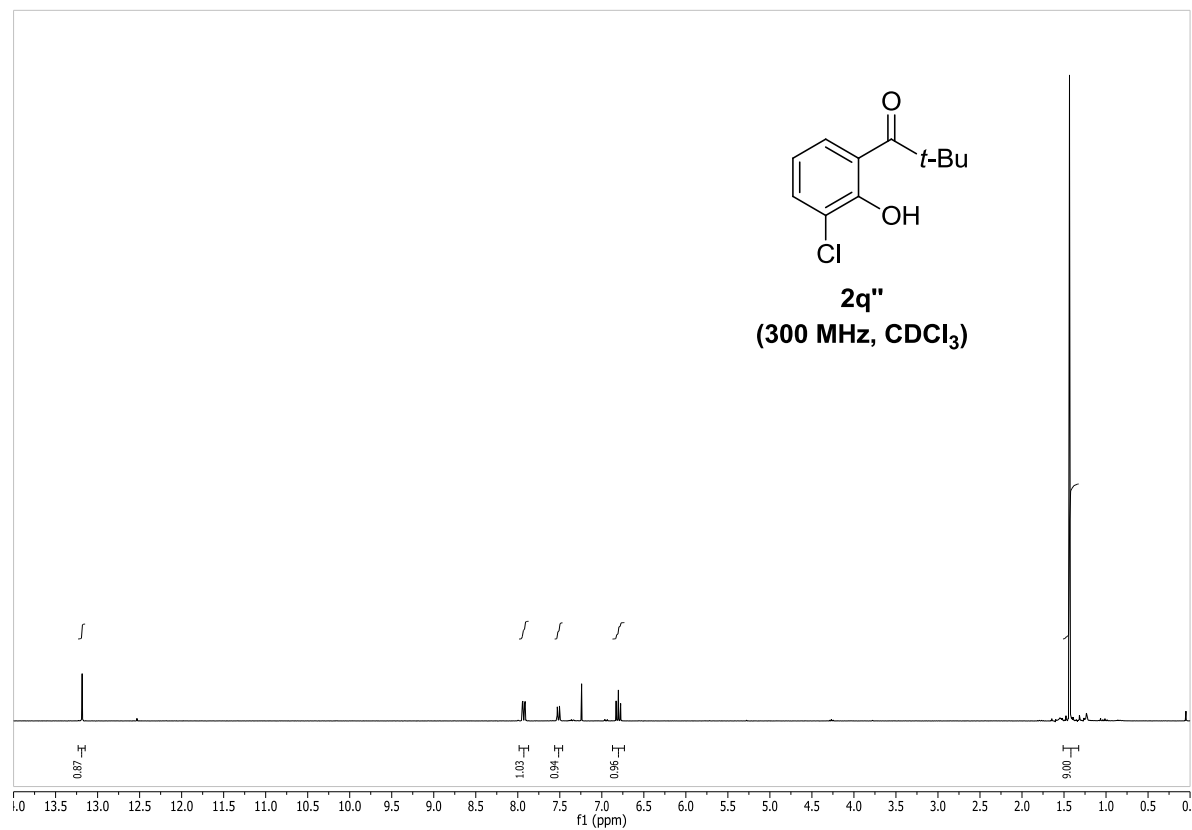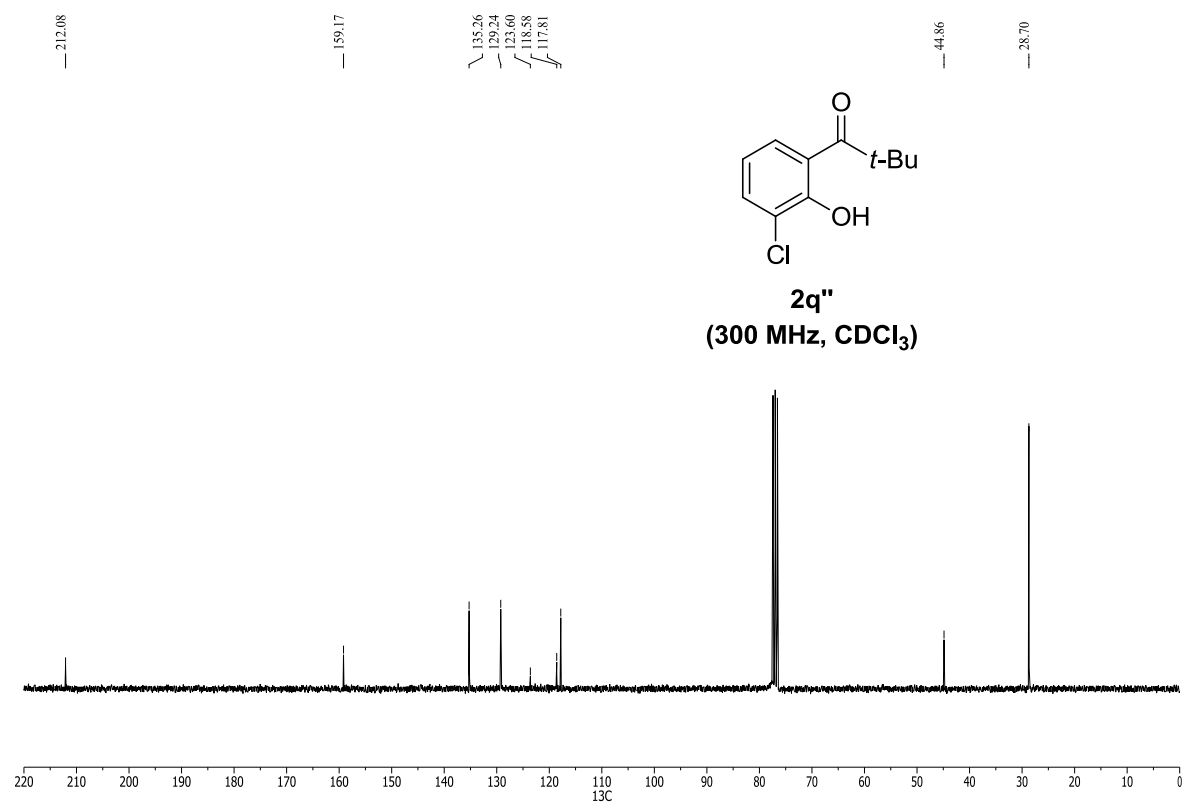

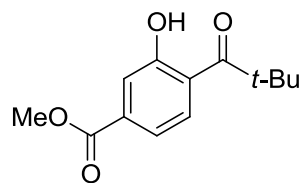

**2r**  
(300 MHz, CDCl<sub>3</sub>)

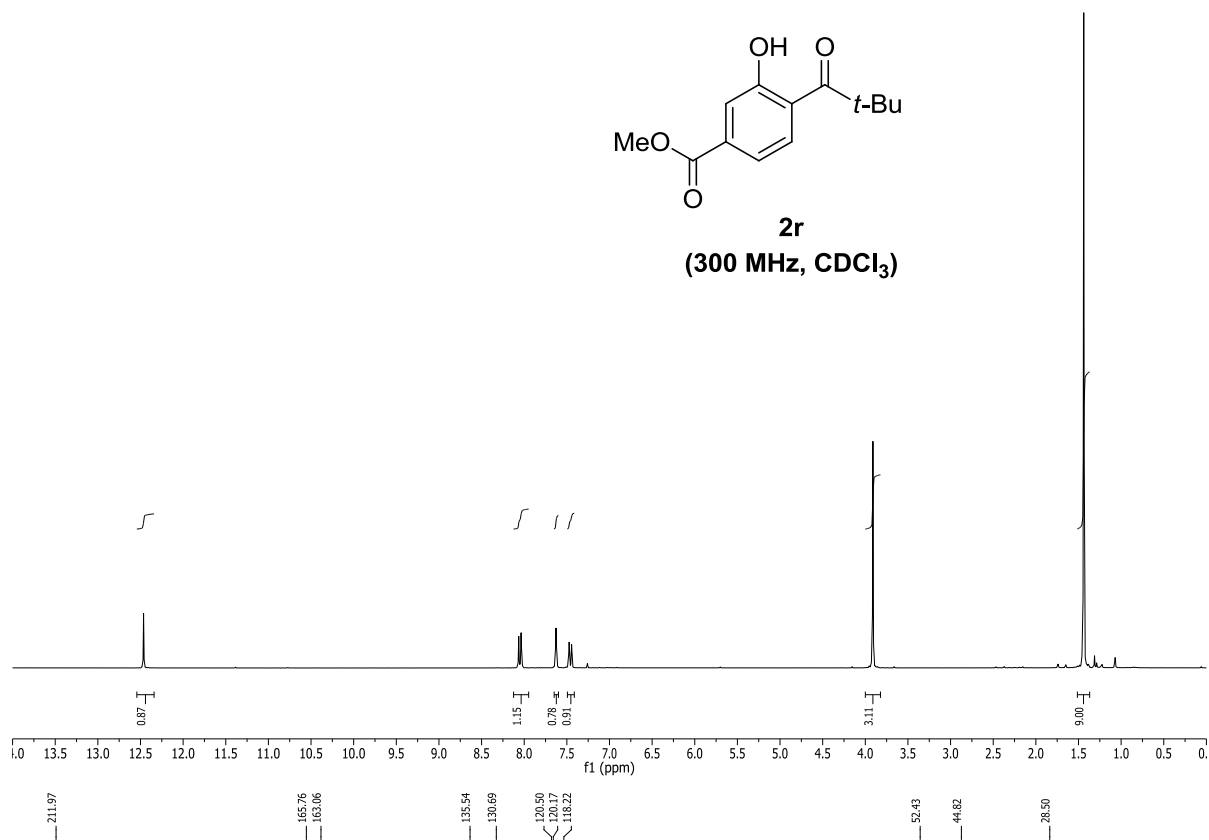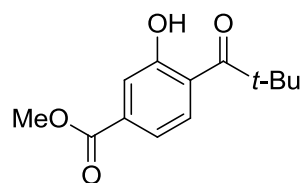

**2r**  
(75 MHz, CDCl<sub>3</sub>)

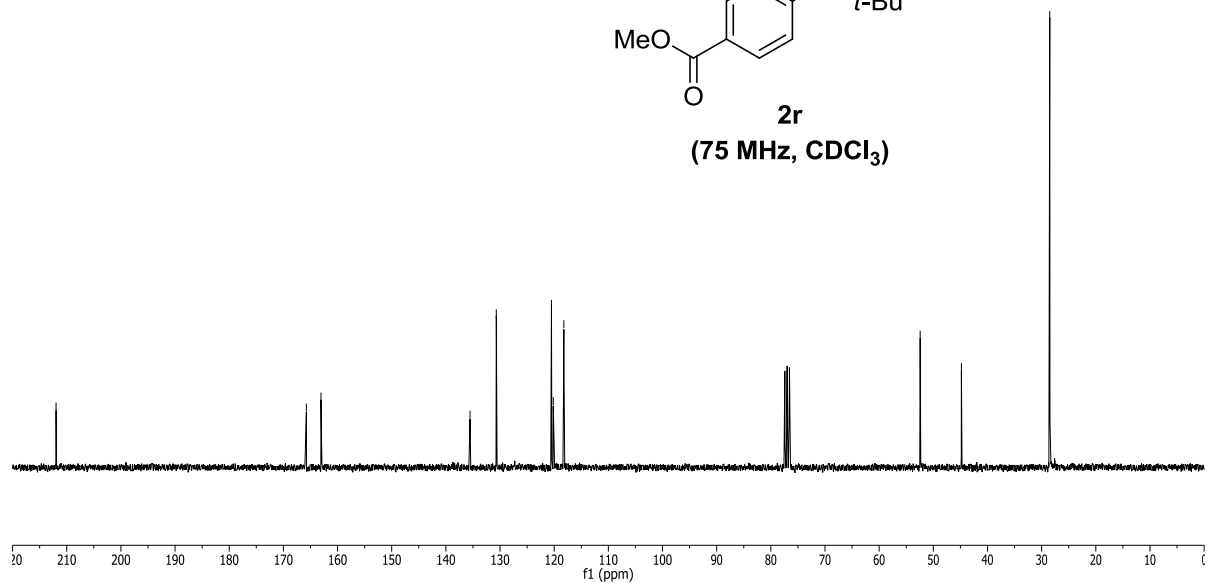

# NOE spectra of **2r**

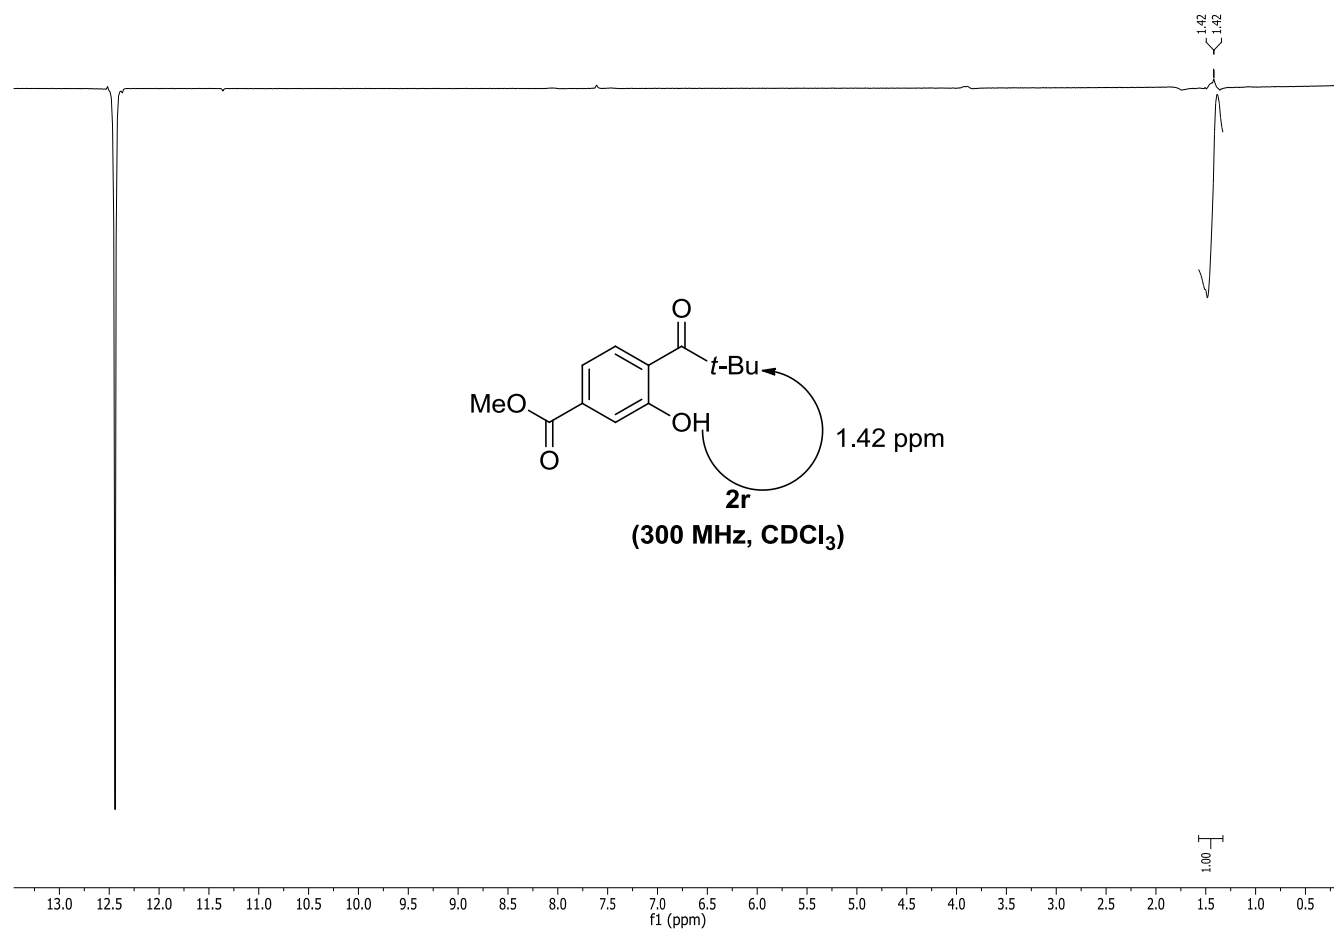

NOE spectra of **2r**

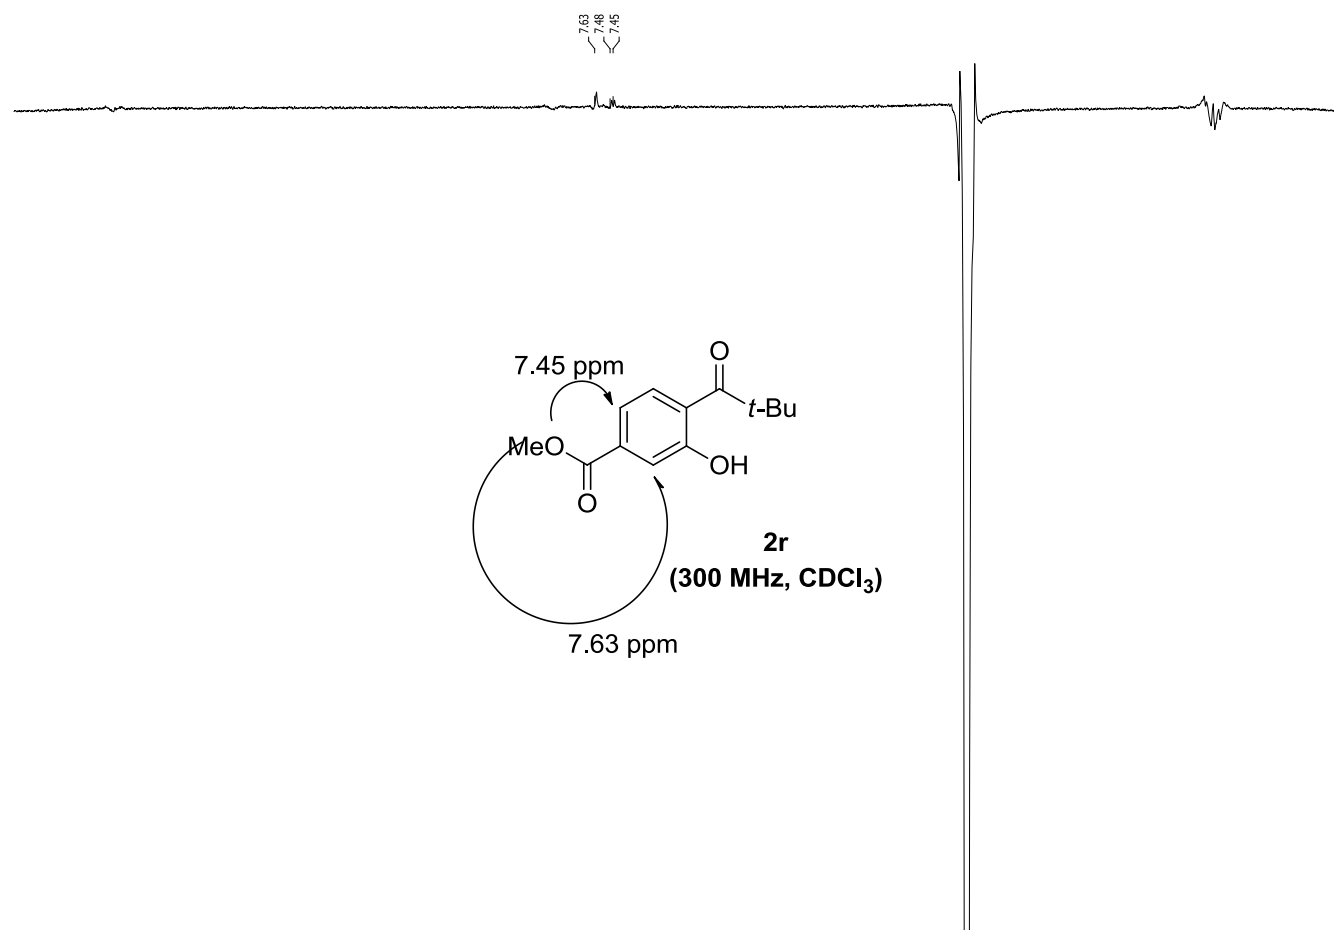



Crude spectra of **2r**

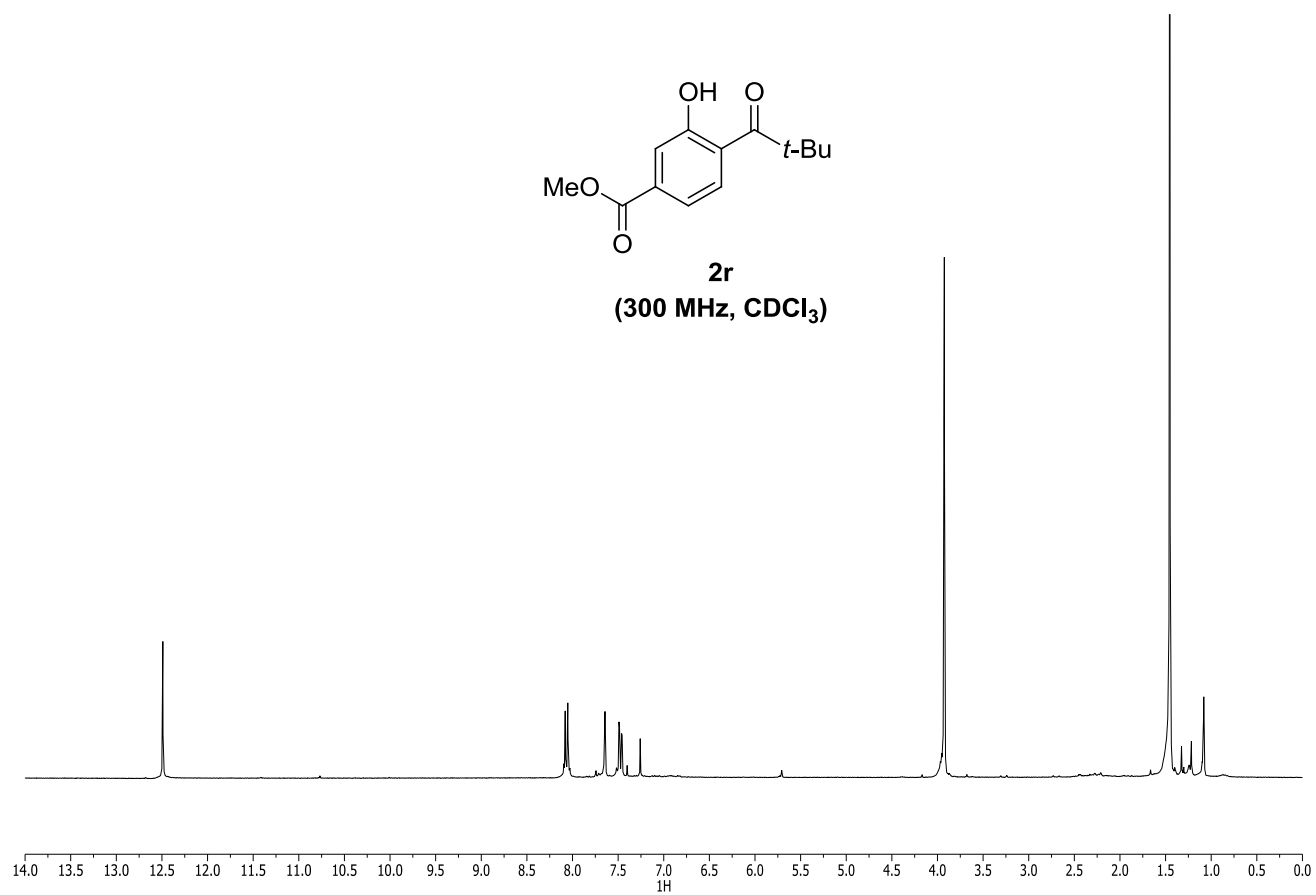

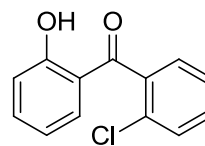

**2s**  
(300 MHz, CDCl<sub>3</sub>)

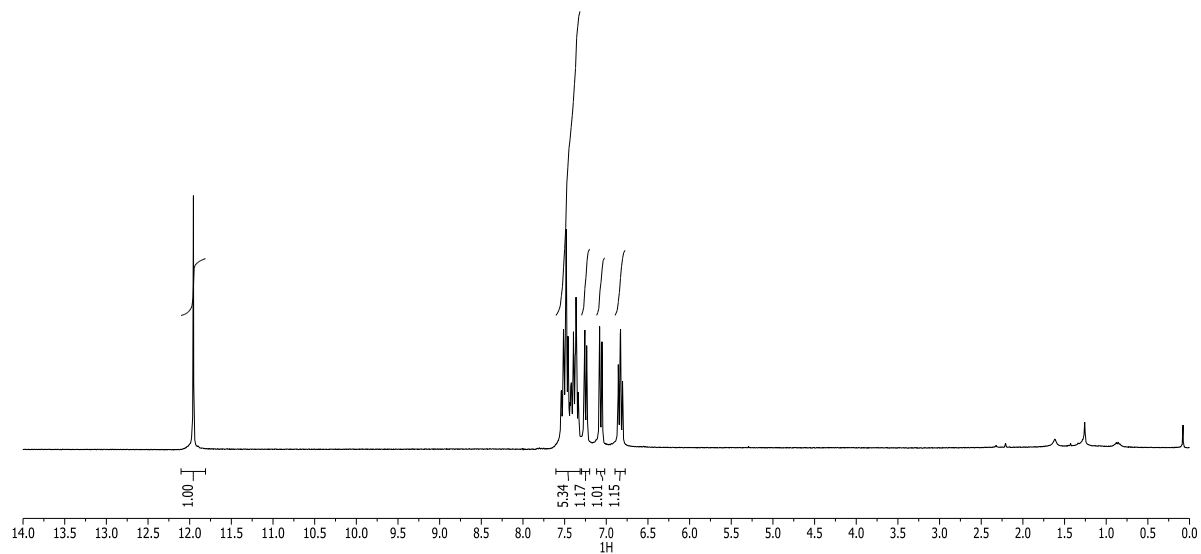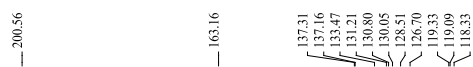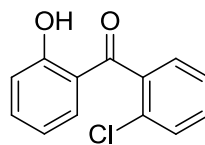

**2s**  
(75 MHz, CDCl<sub>3</sub>)

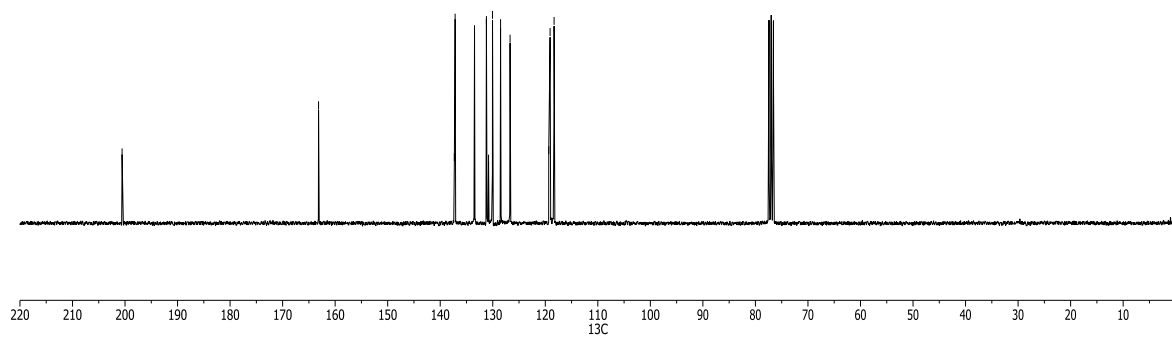

# The NMR Spectra of Competition Study between **1f** and **1i**

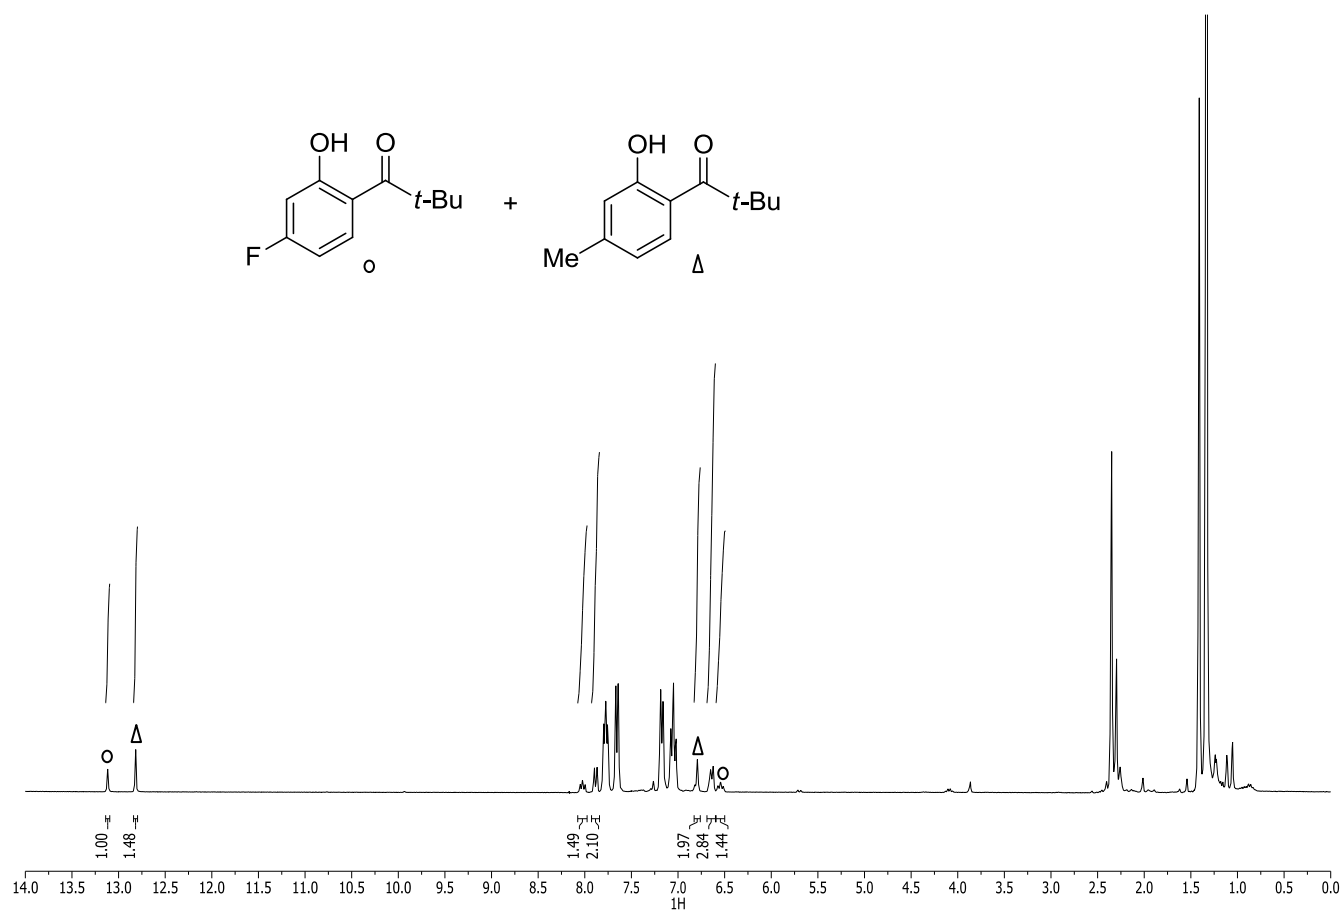

# The NMR Spectra of Competition Study between **1f** and **1g**

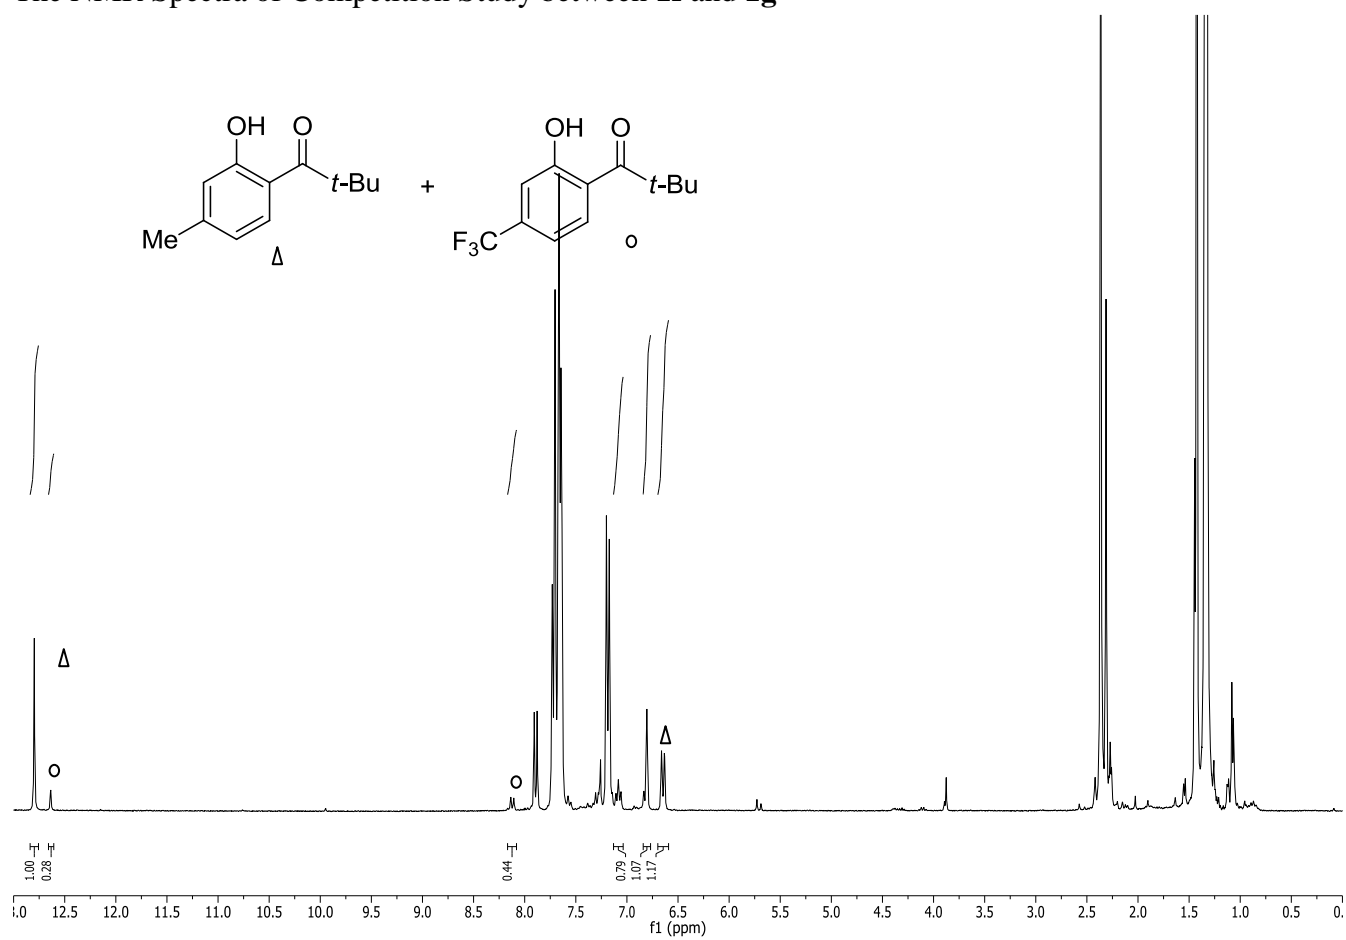

# The NMR Spectra of Competition Study between **1a** and **1i**

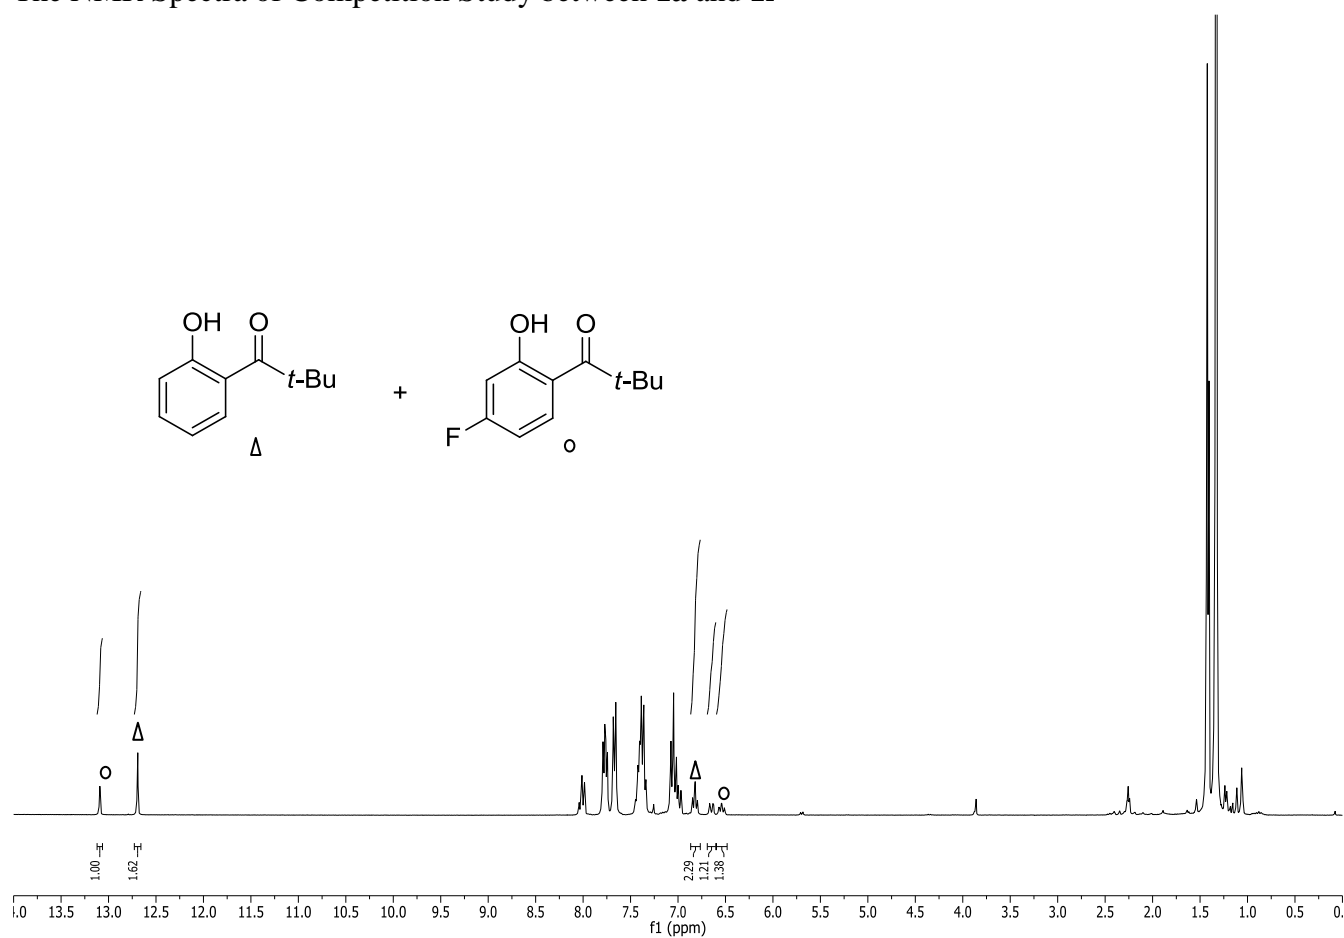

Supplement: Supplementary file 1 [file 4101262]
